# Supplementary material for: Aerobic oxidation of thiols to disulfides under ball-milling in the absence of any catalyst, solvent, or base
Source: Royal Society of Chemistry journal article supplement (doi:10.1039/c3ra41996g), 2013-01-01

## **Electronic Supplementary Information**

### **Aerobic oxidation of thiols to disulfides under ball-milling in absence of any catalyst, solvent and base**

**Tanmay Chatterjee and Brindaban C. Ranu \***

| <b>Table of content</b>                                                                                           | <b>Pages</b> |
|-------------------------------------------------------------------------------------------------------------------|--------------|
| <b>Copies of <math>^1\text{H}</math> and <math>^{13}\text{C}</math> NMR of all the products listed in Table 2</b> | <b>2-24</b>  |

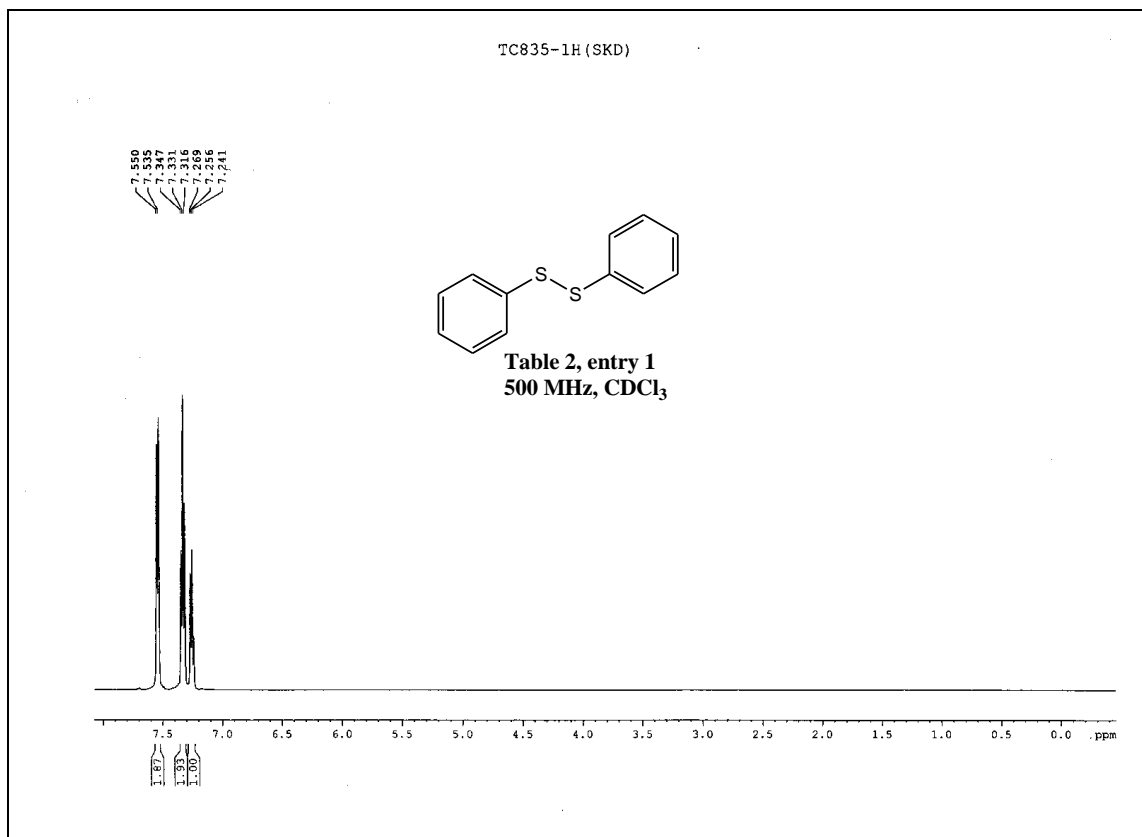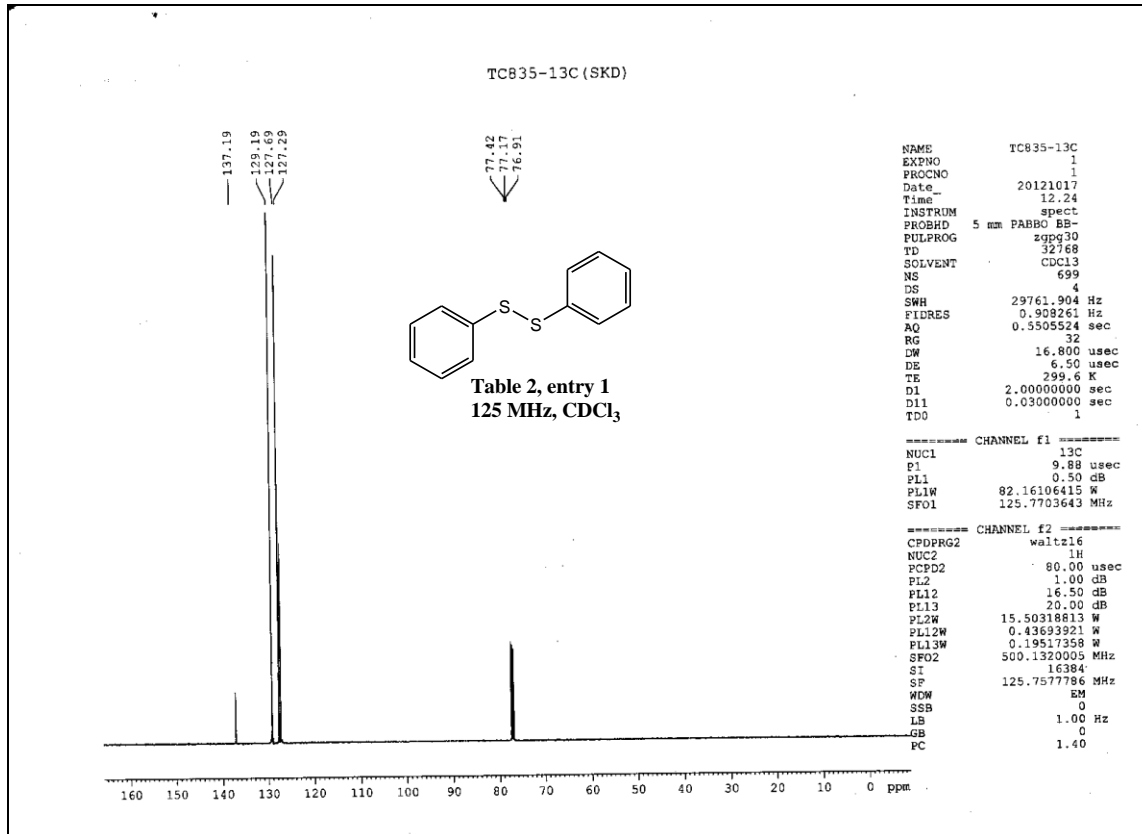

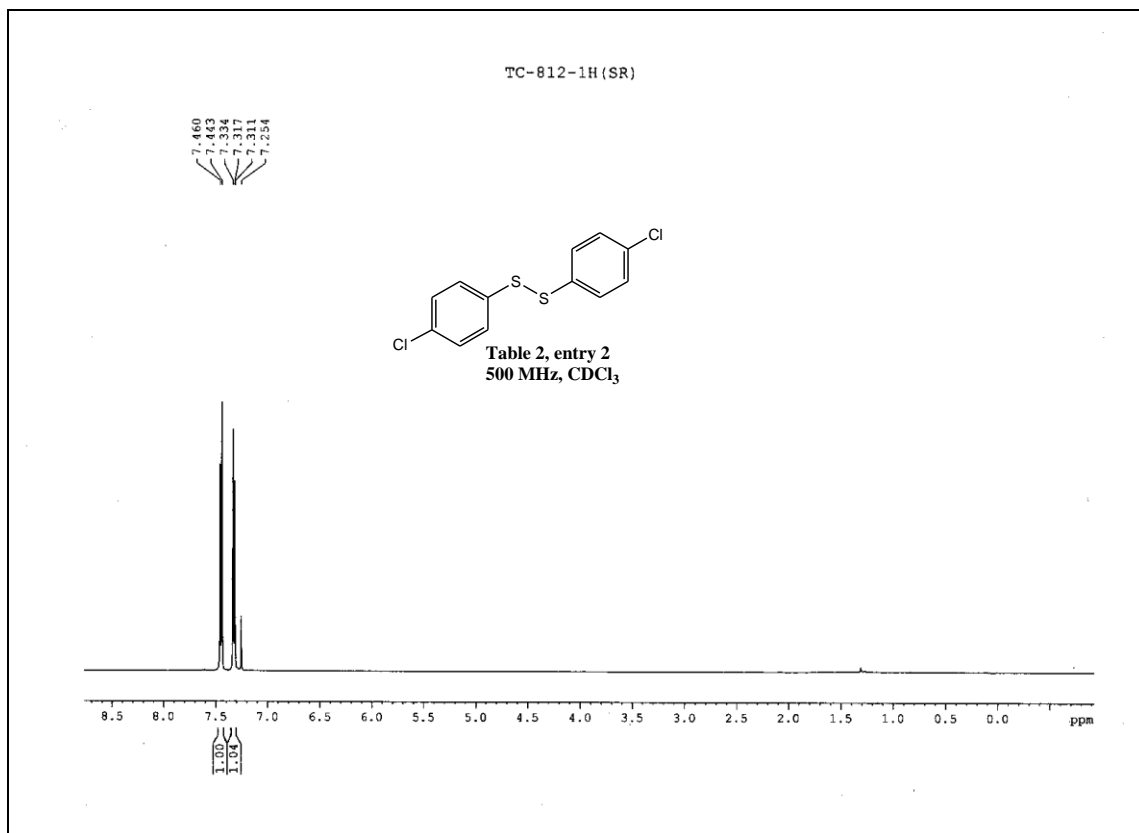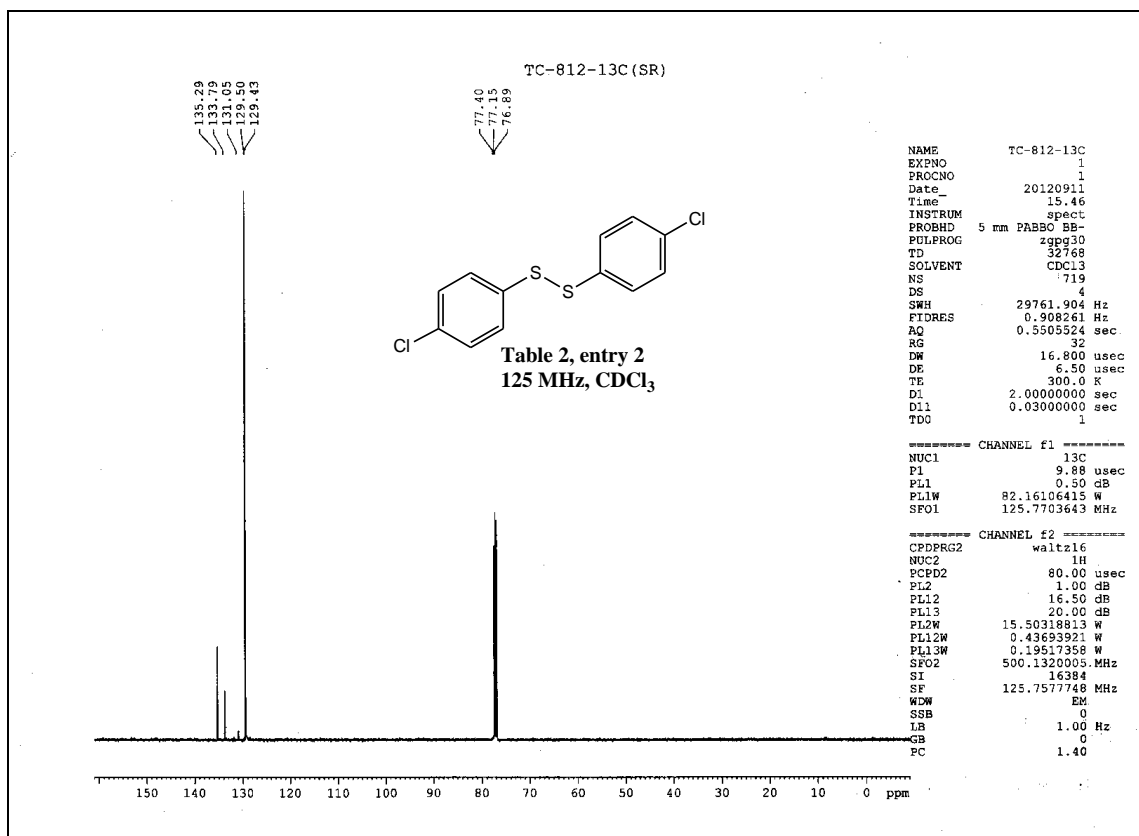

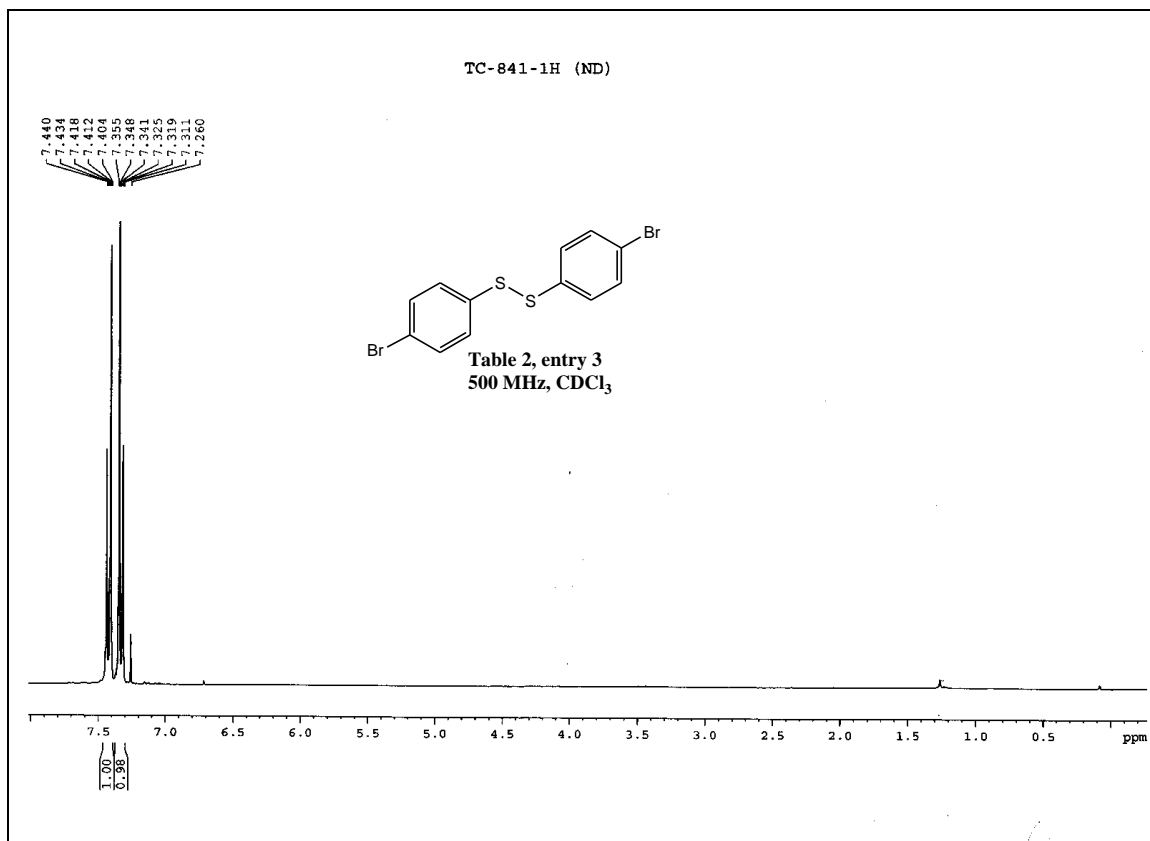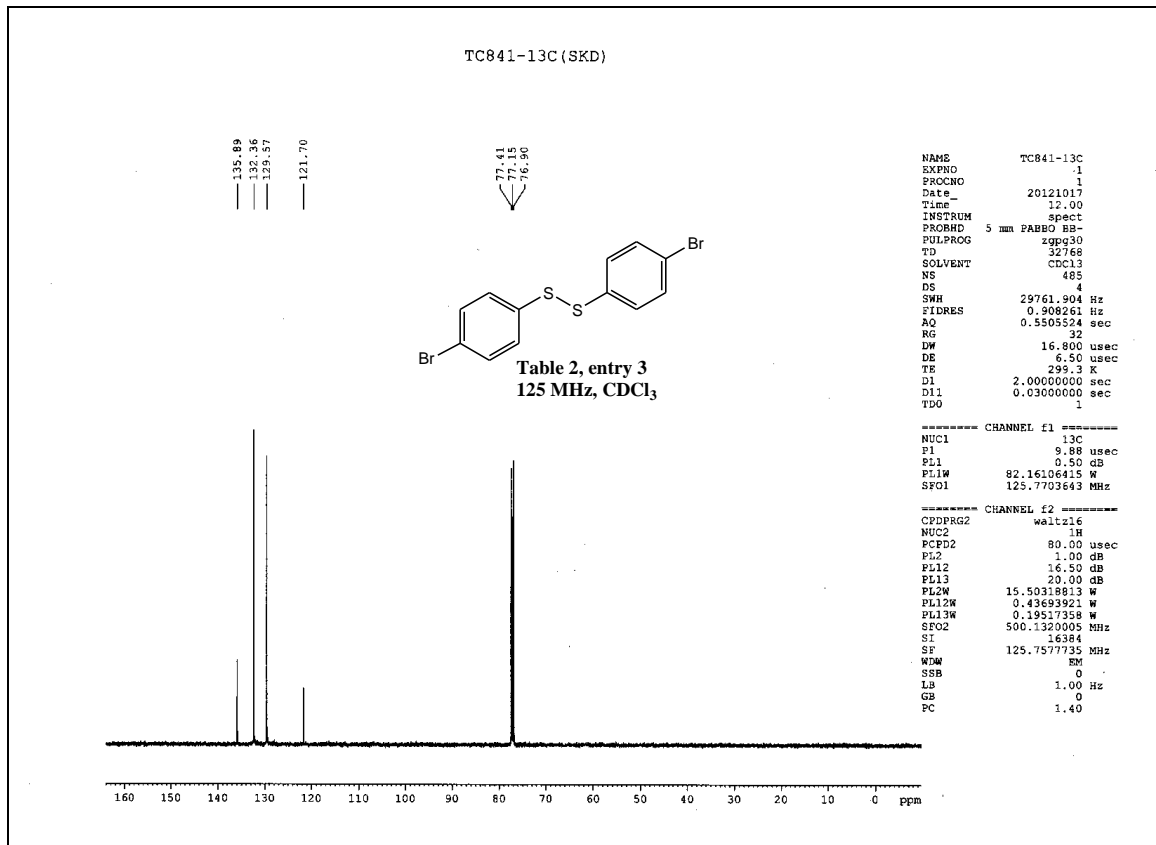

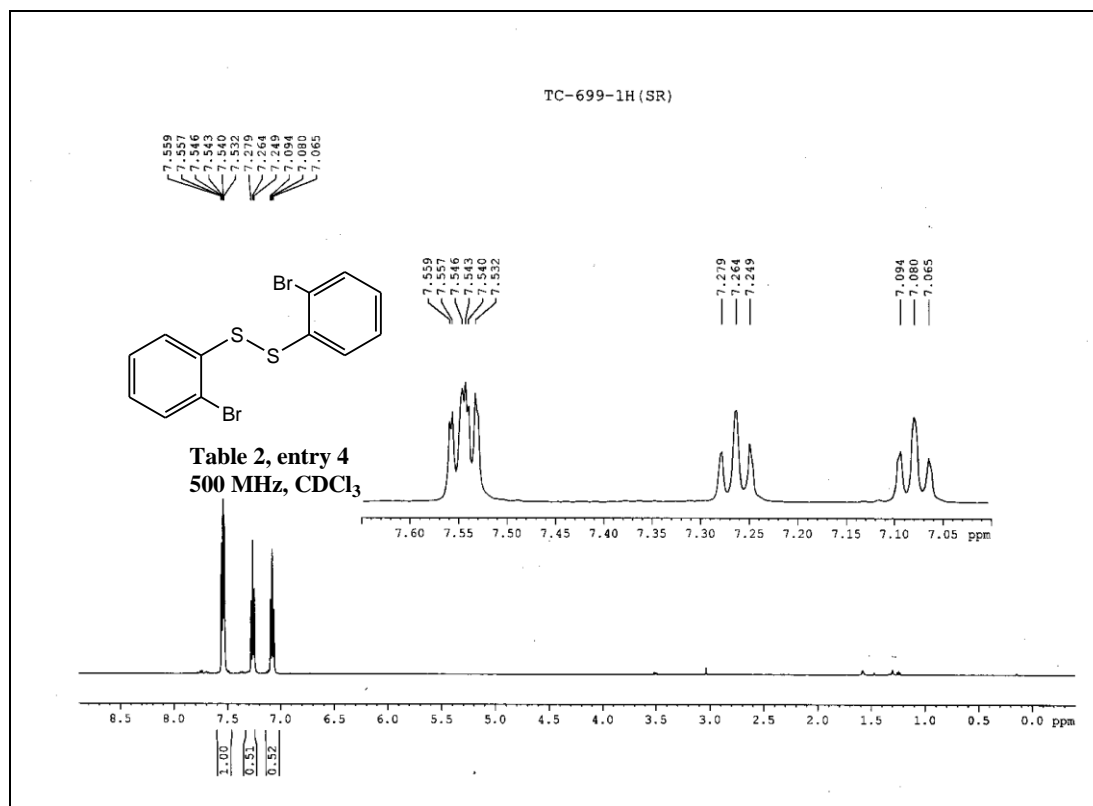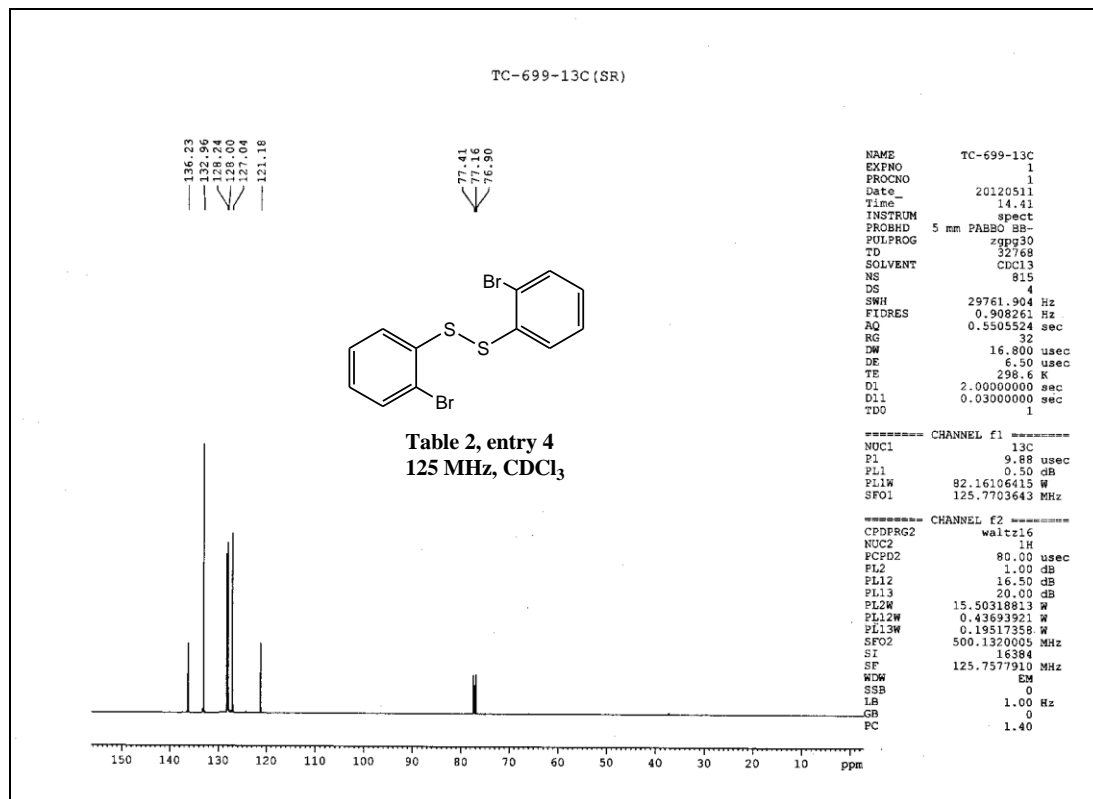

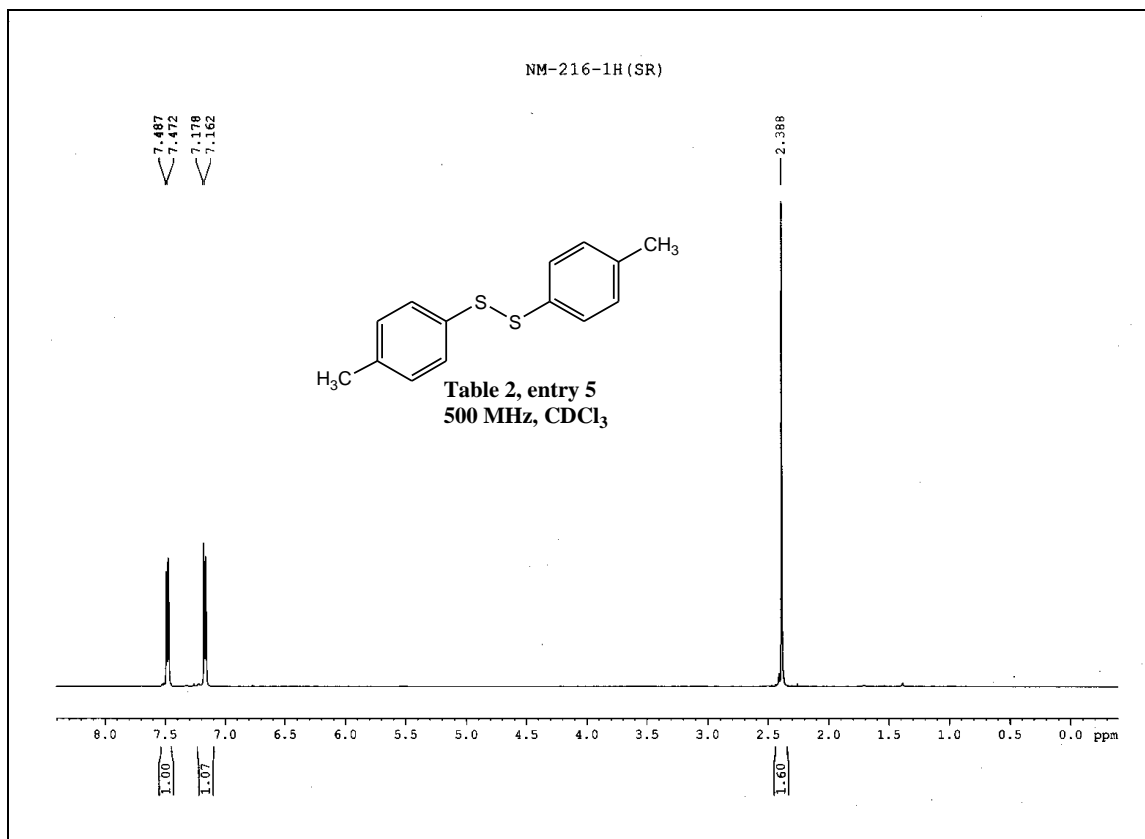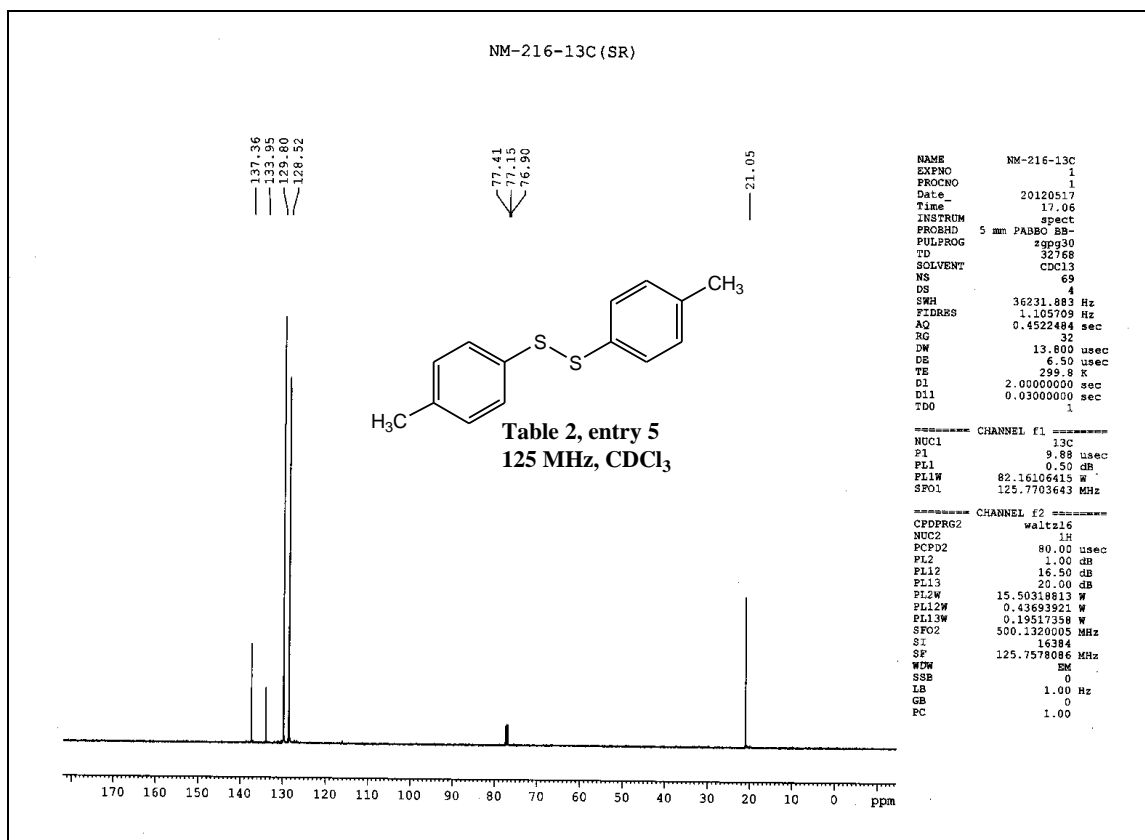

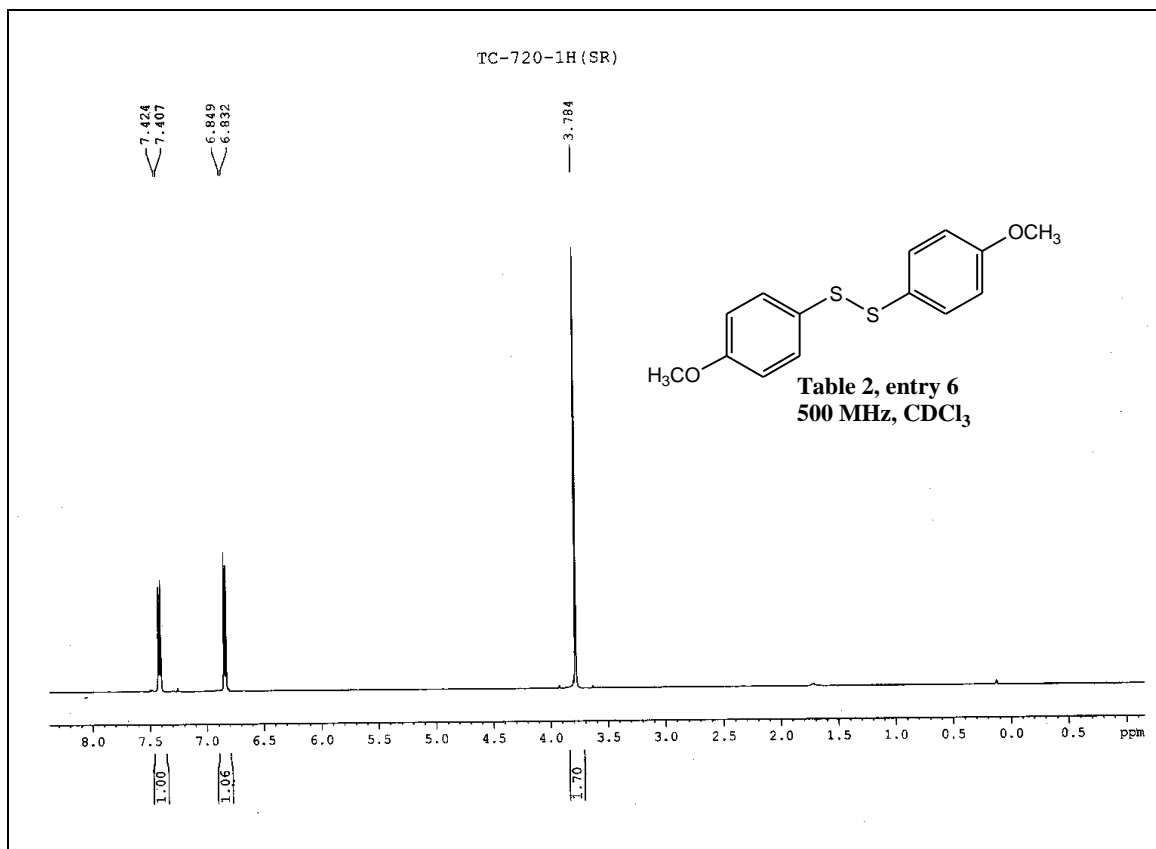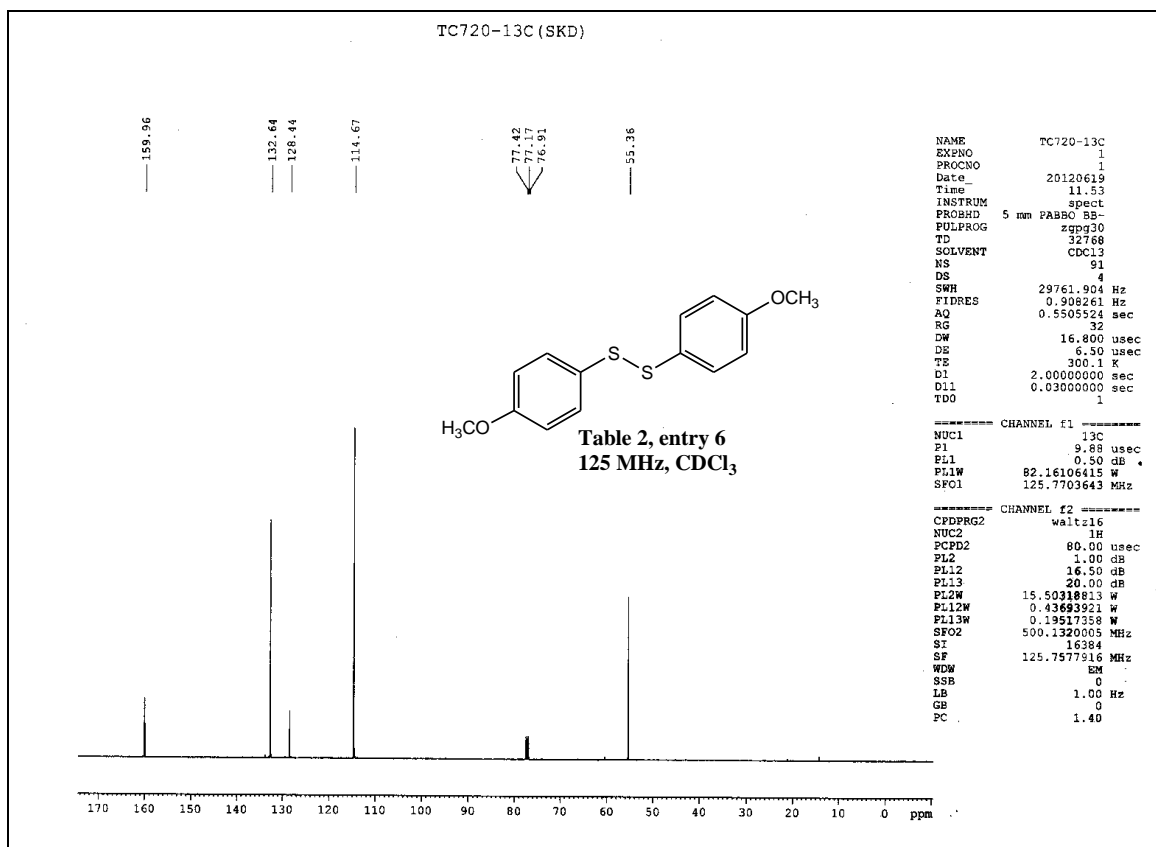

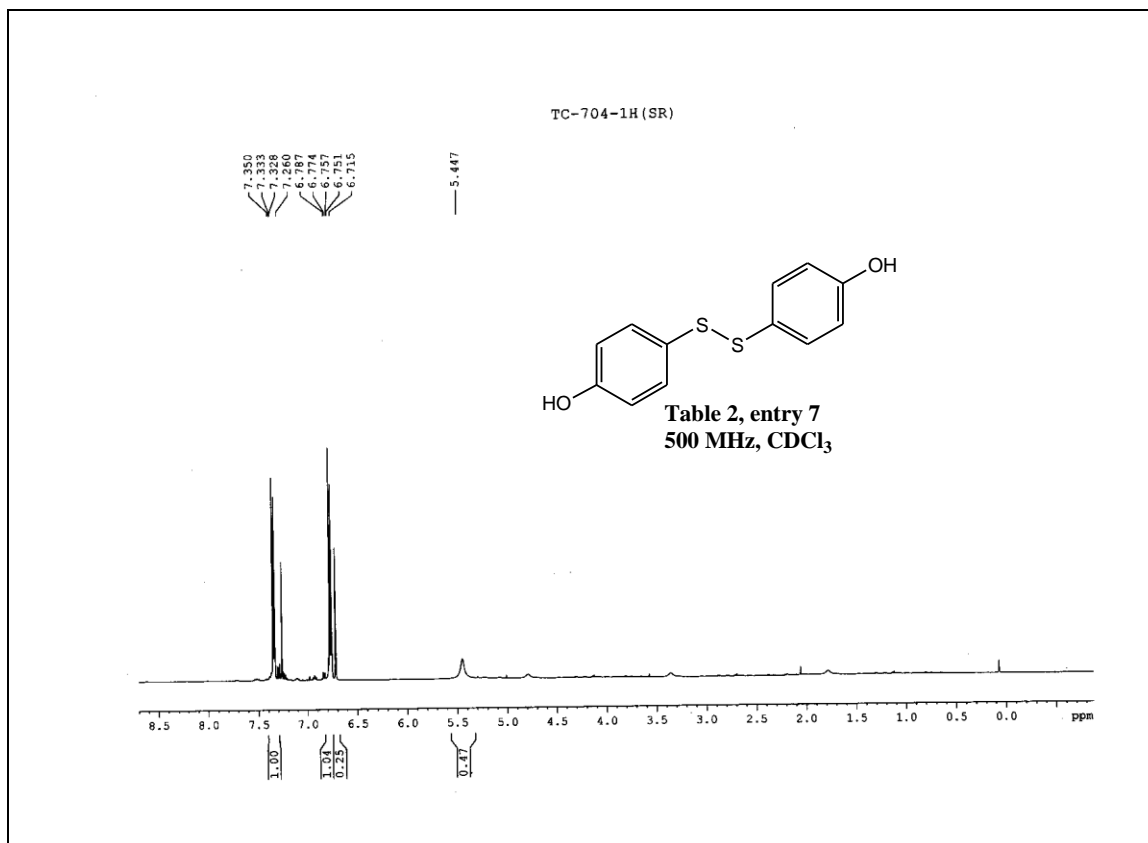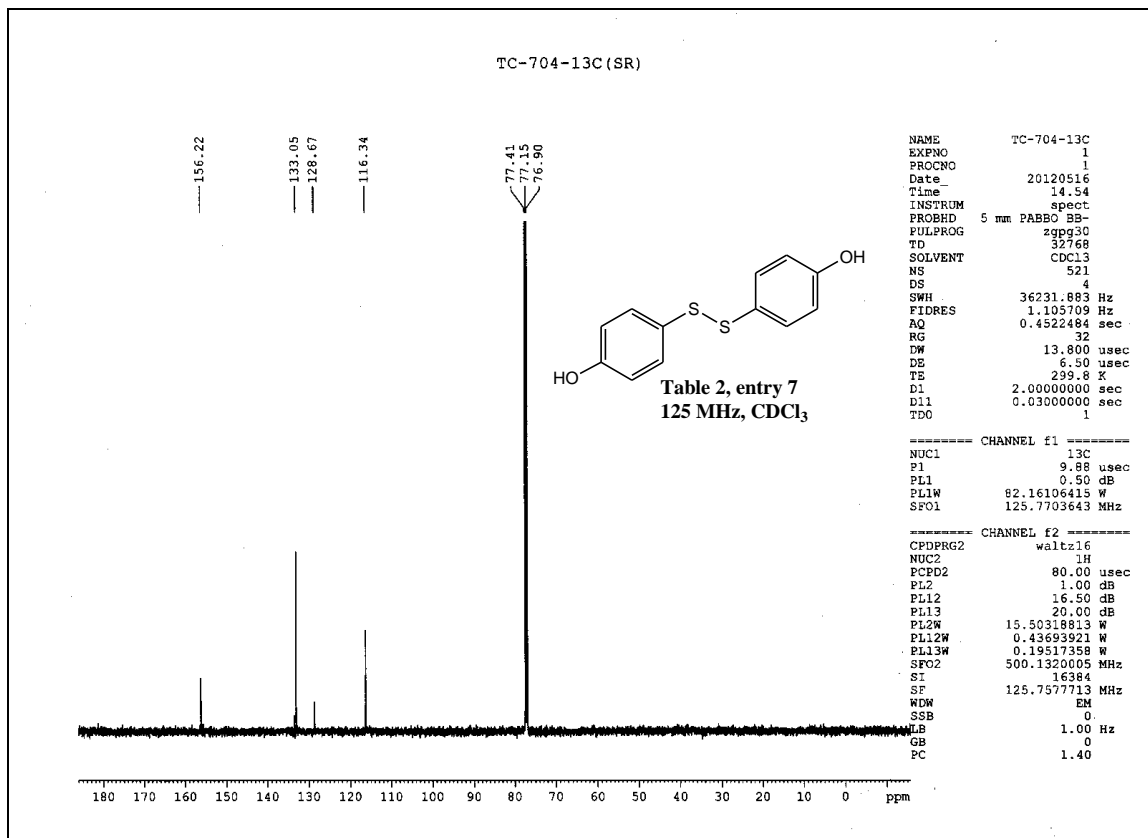



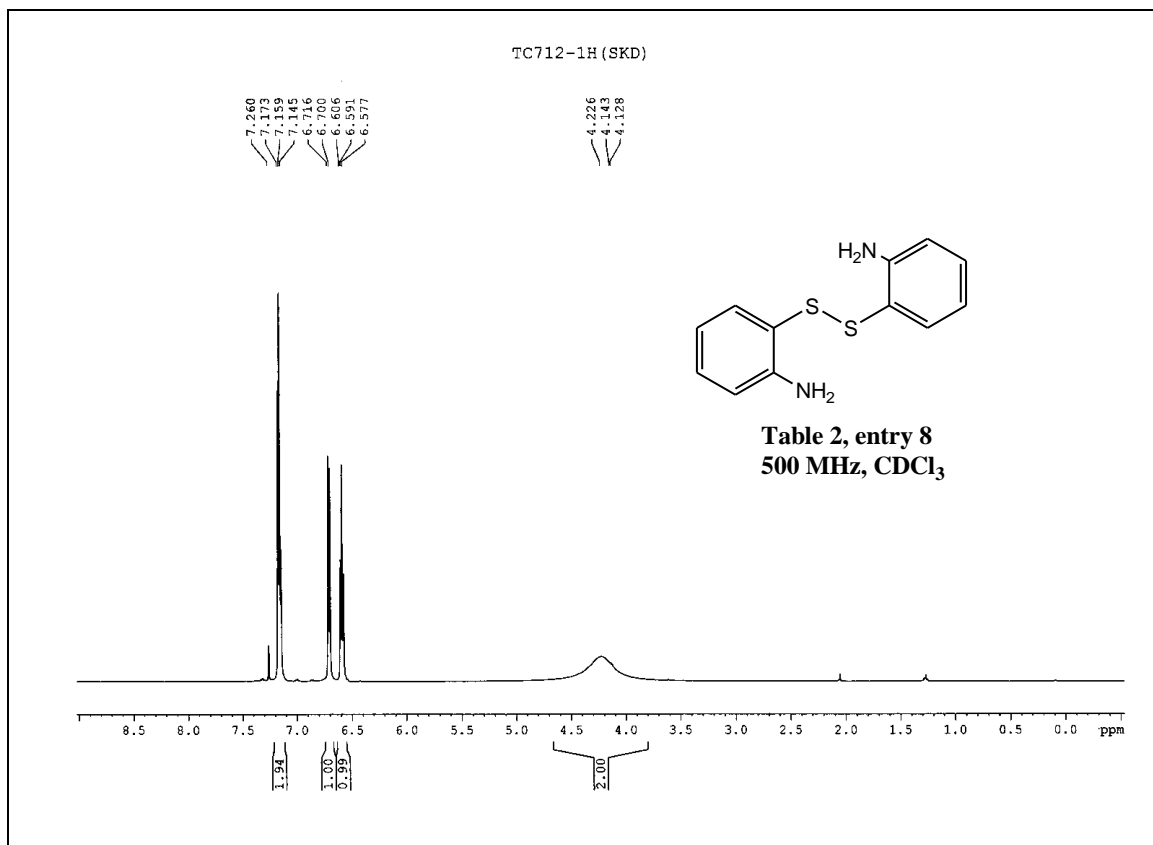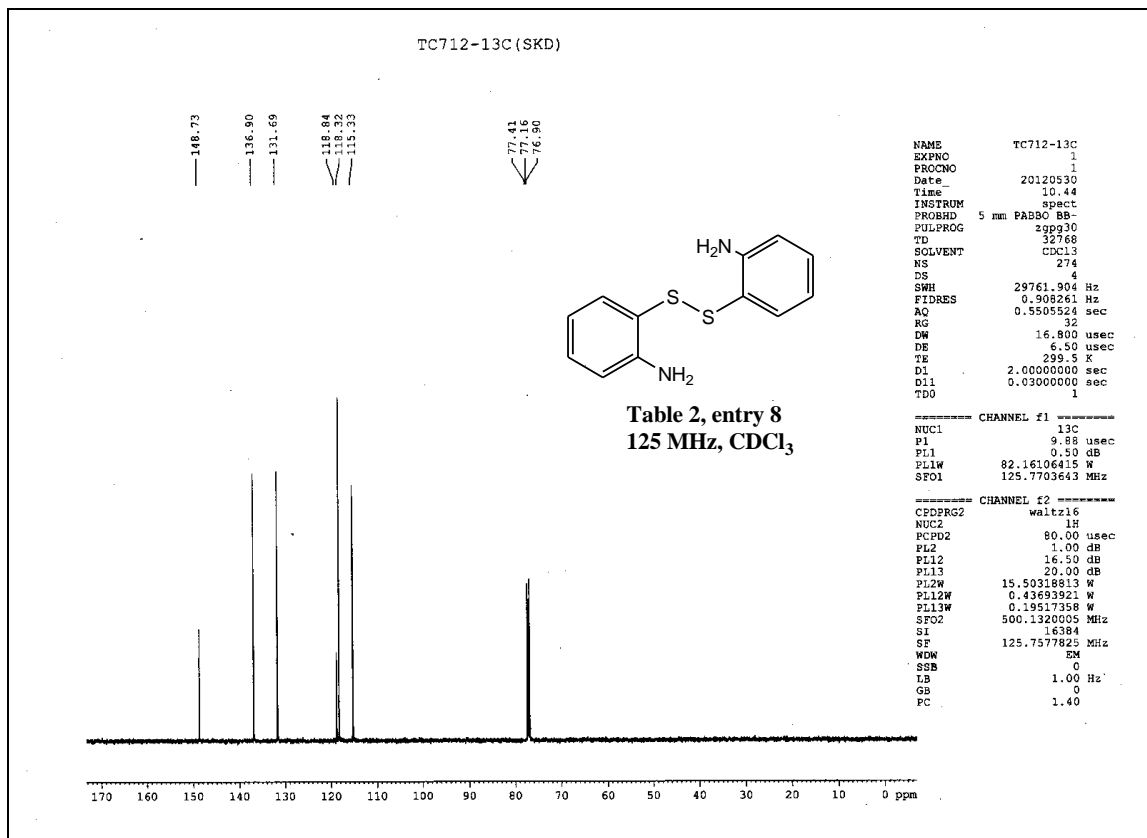

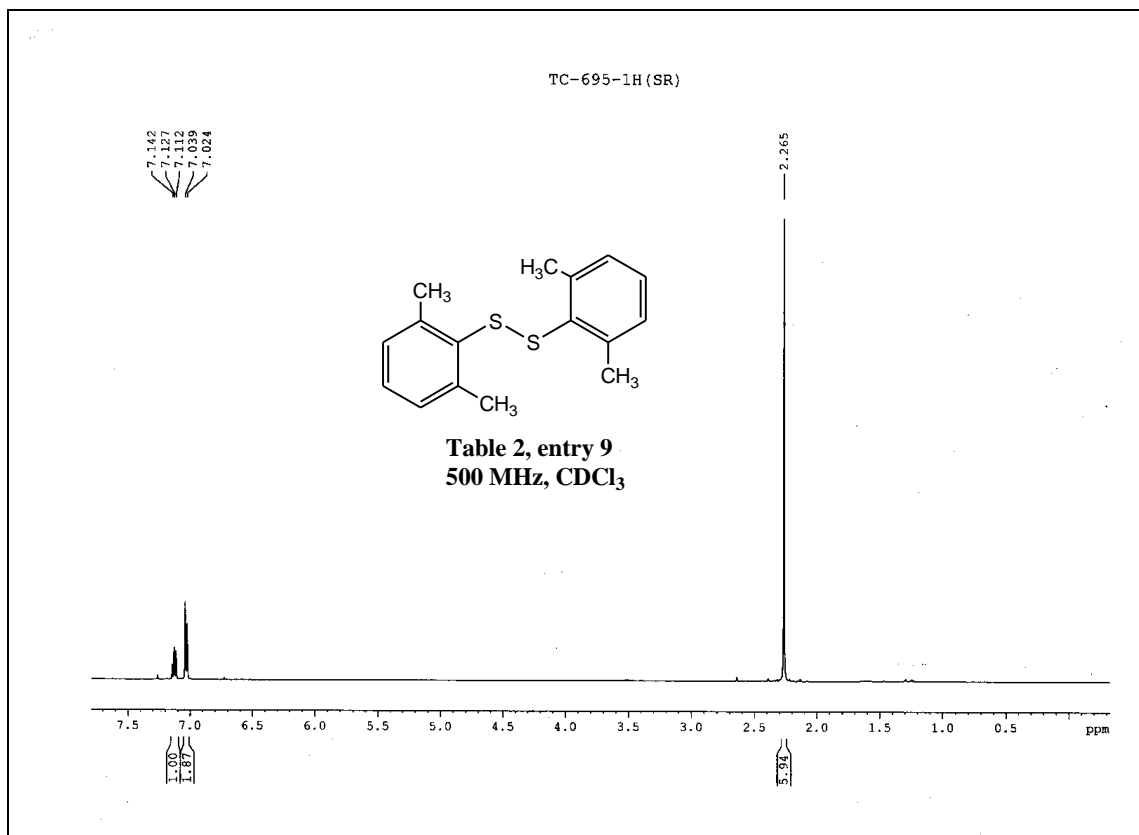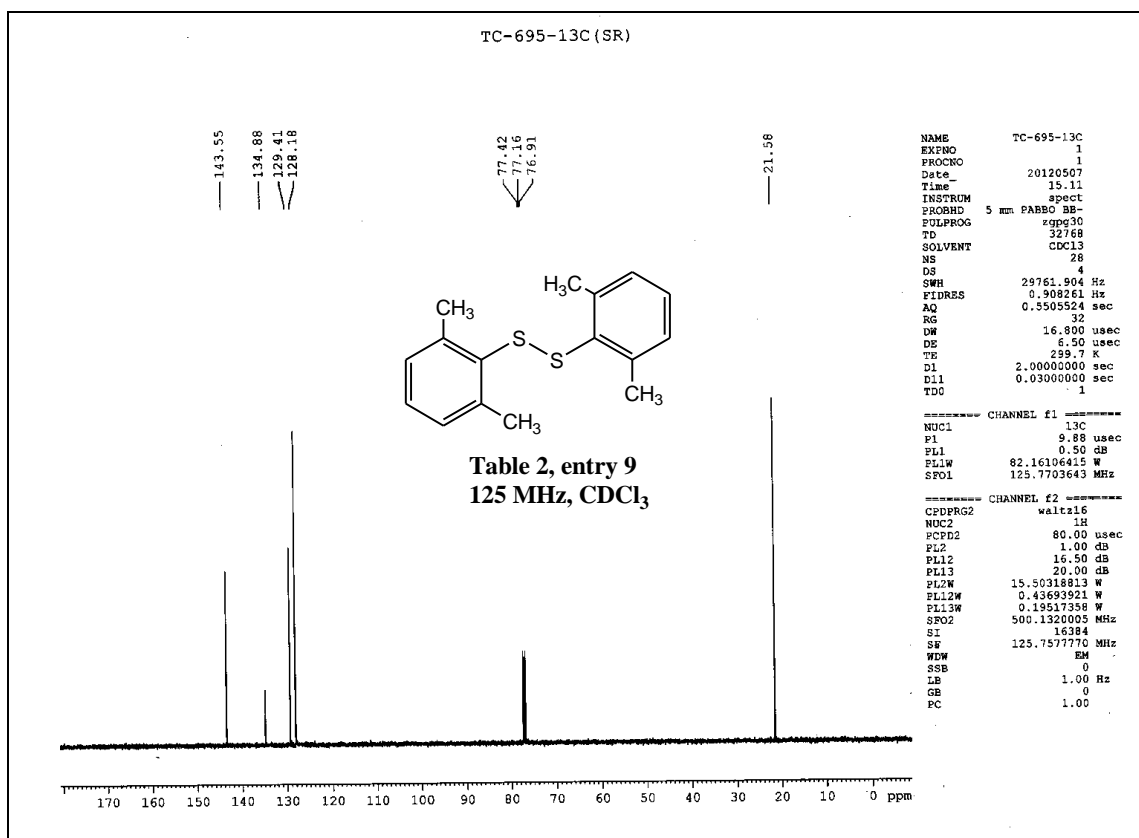

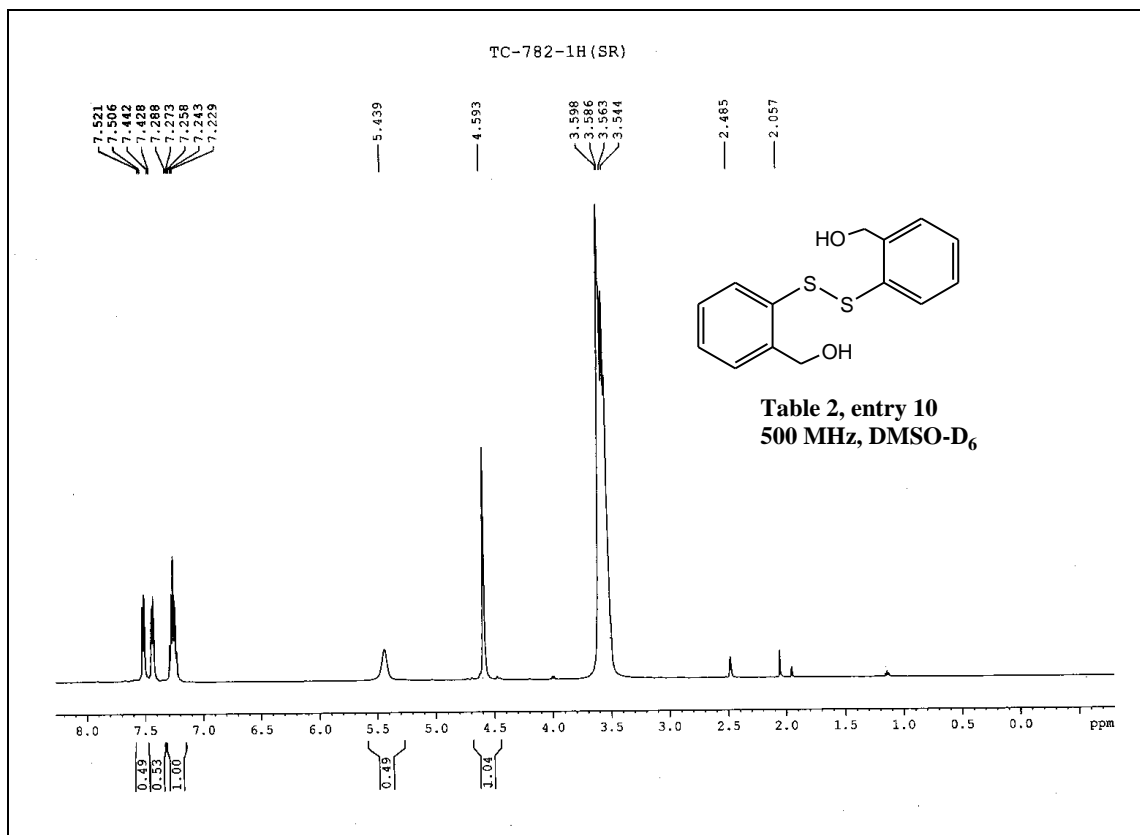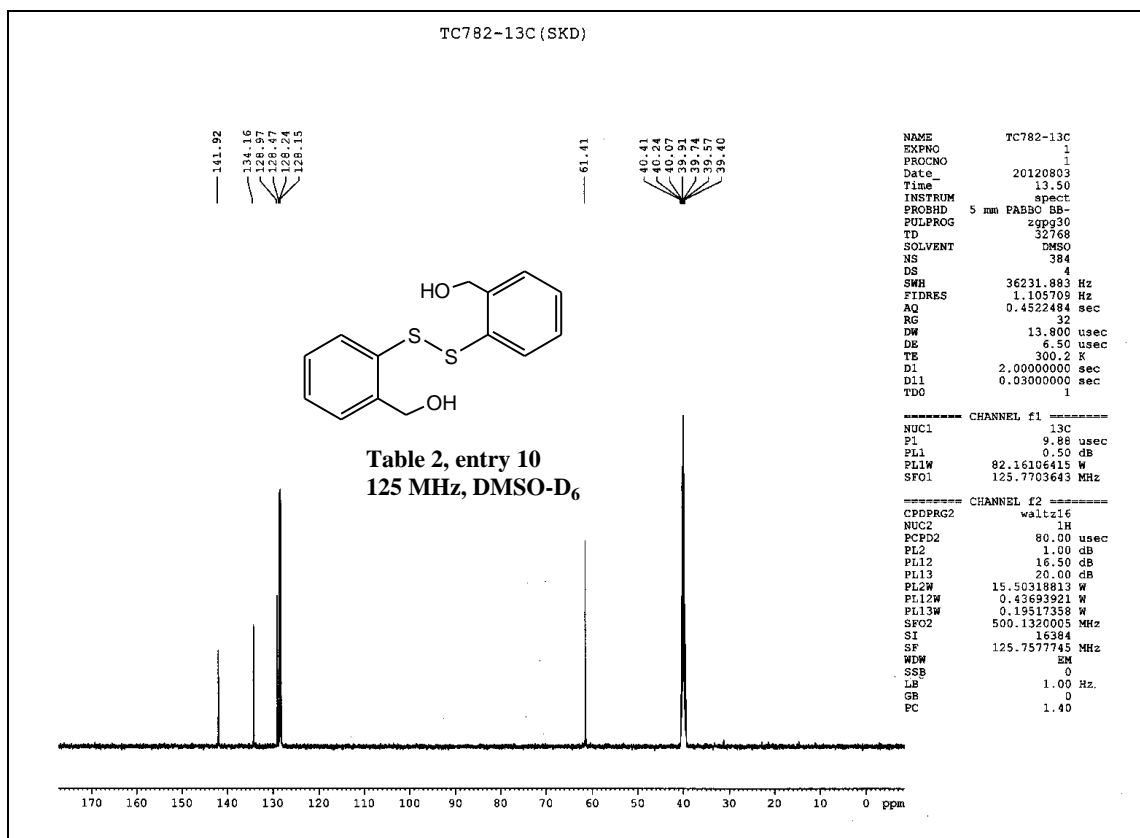

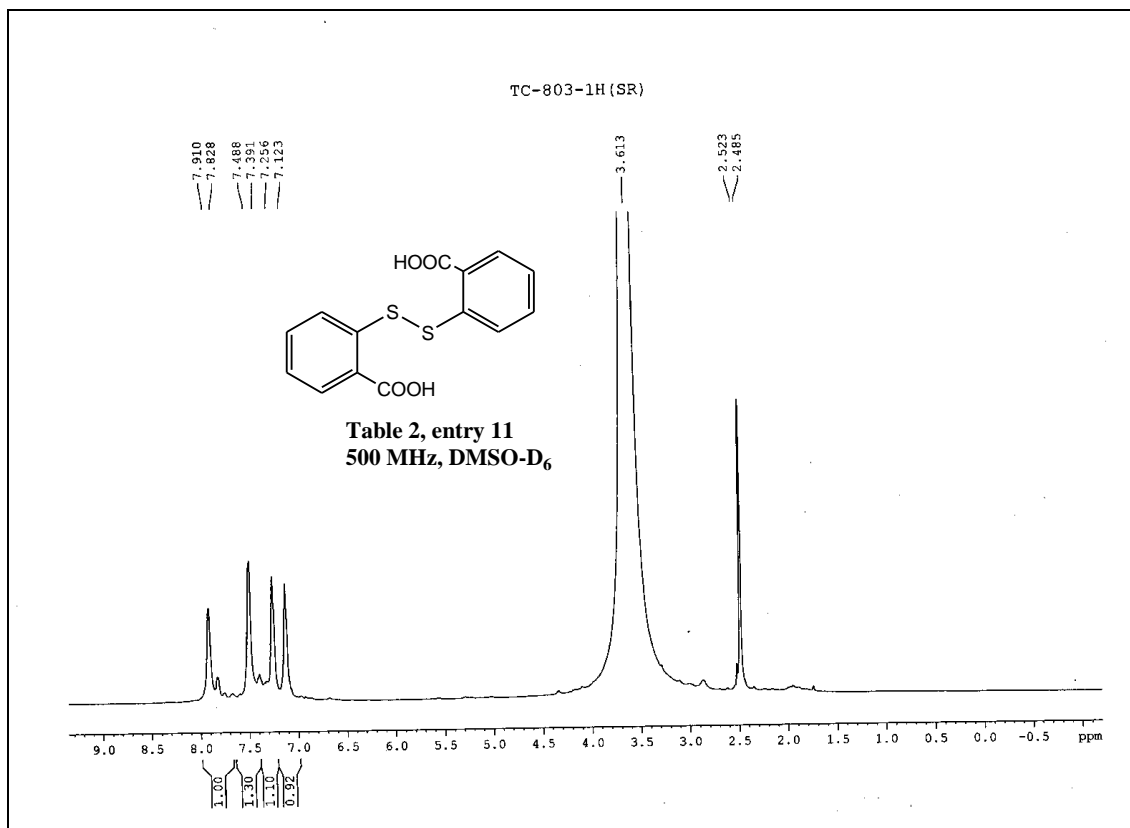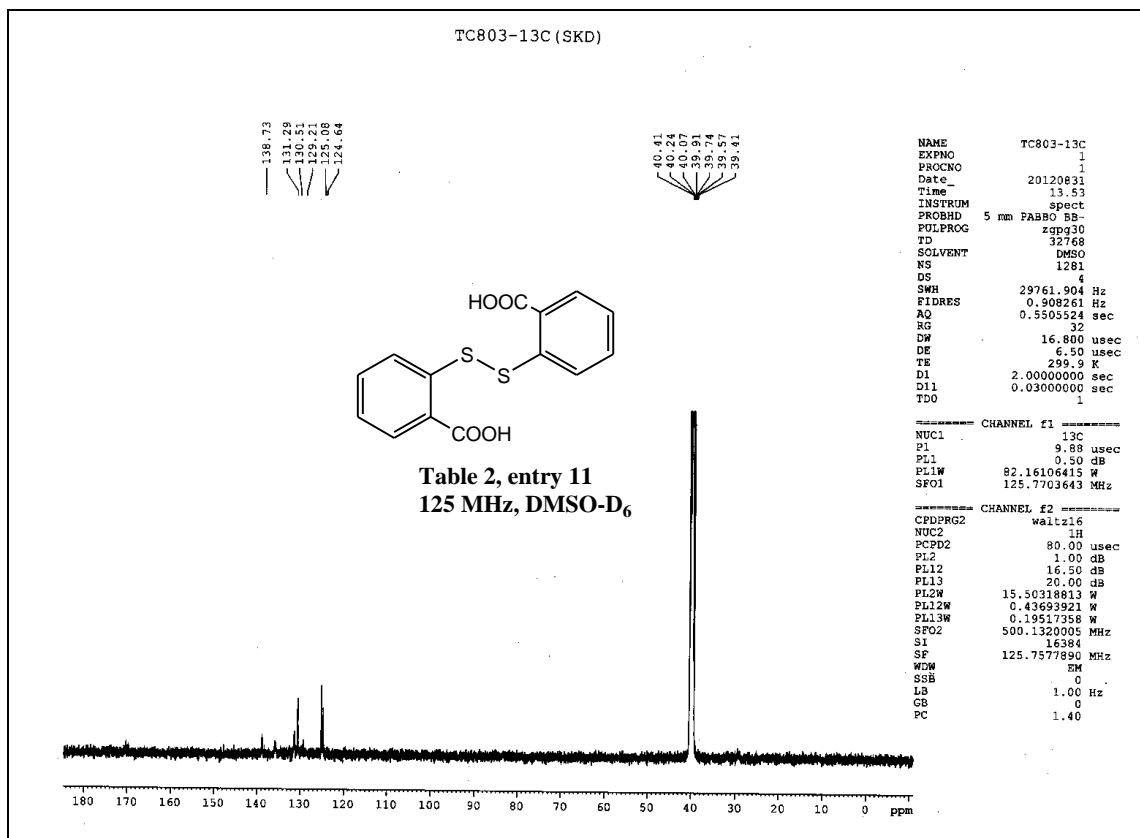

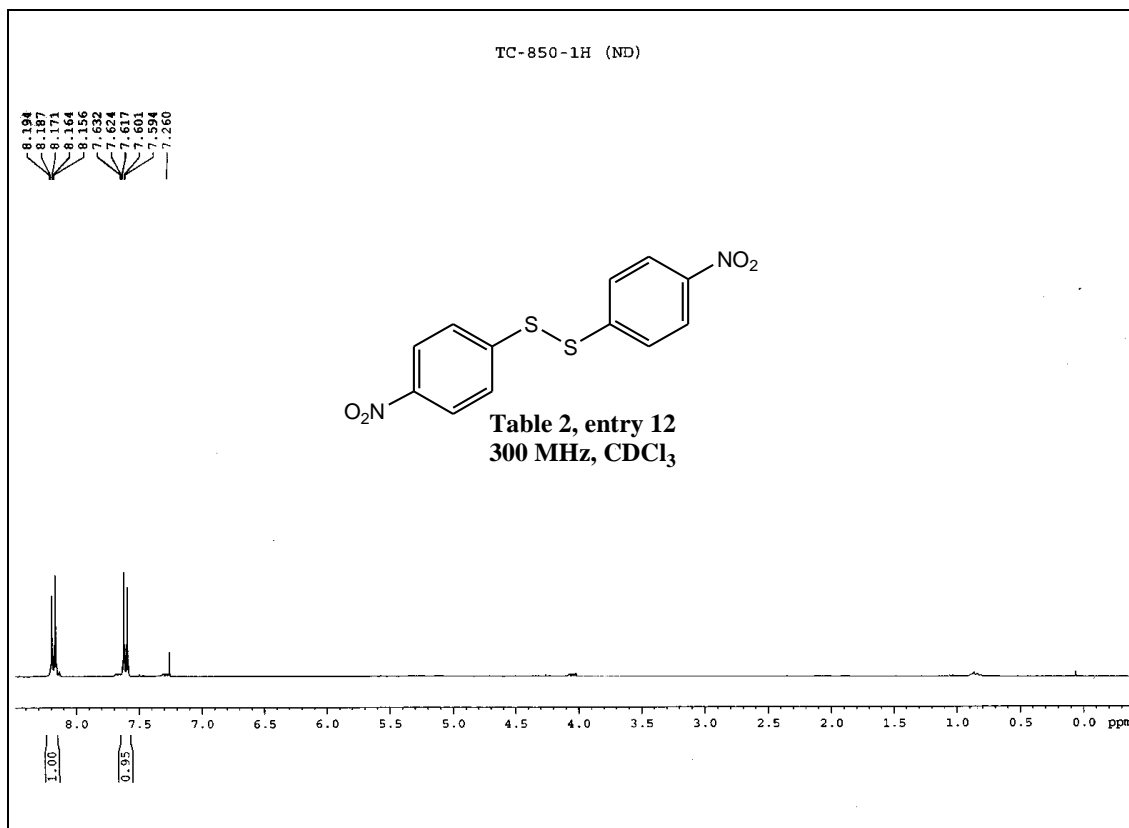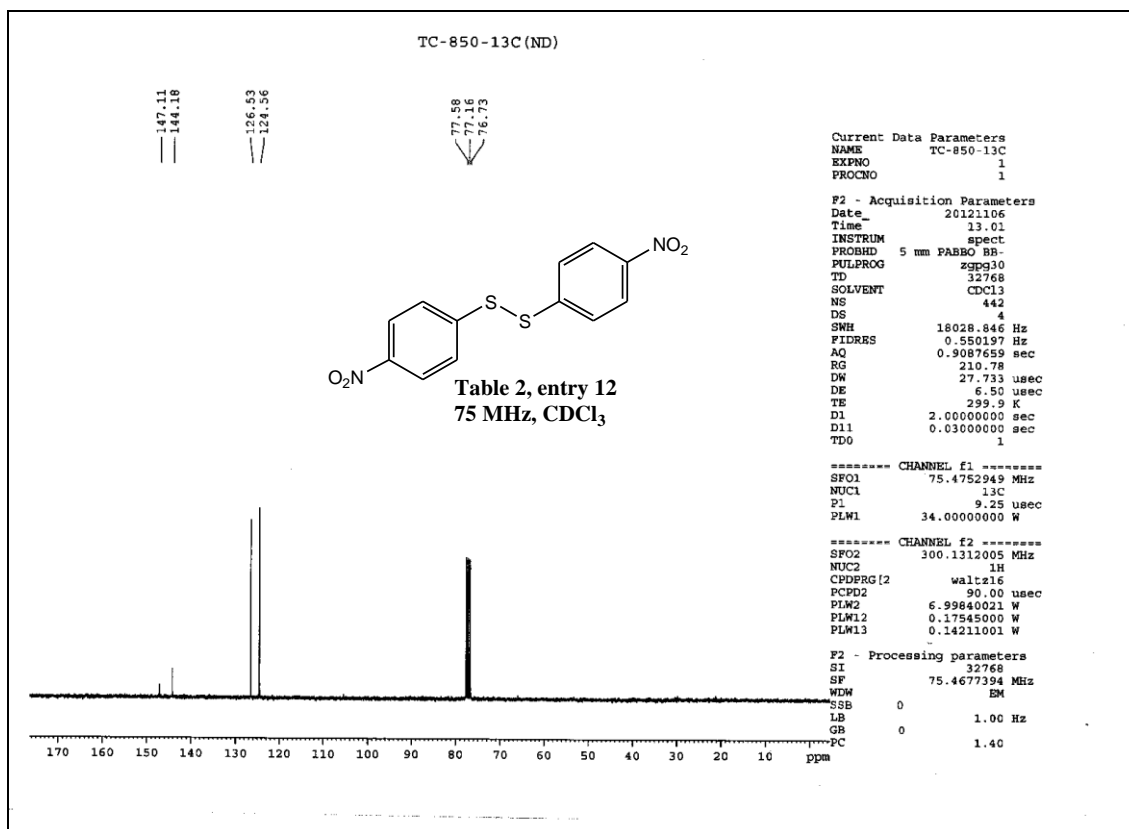

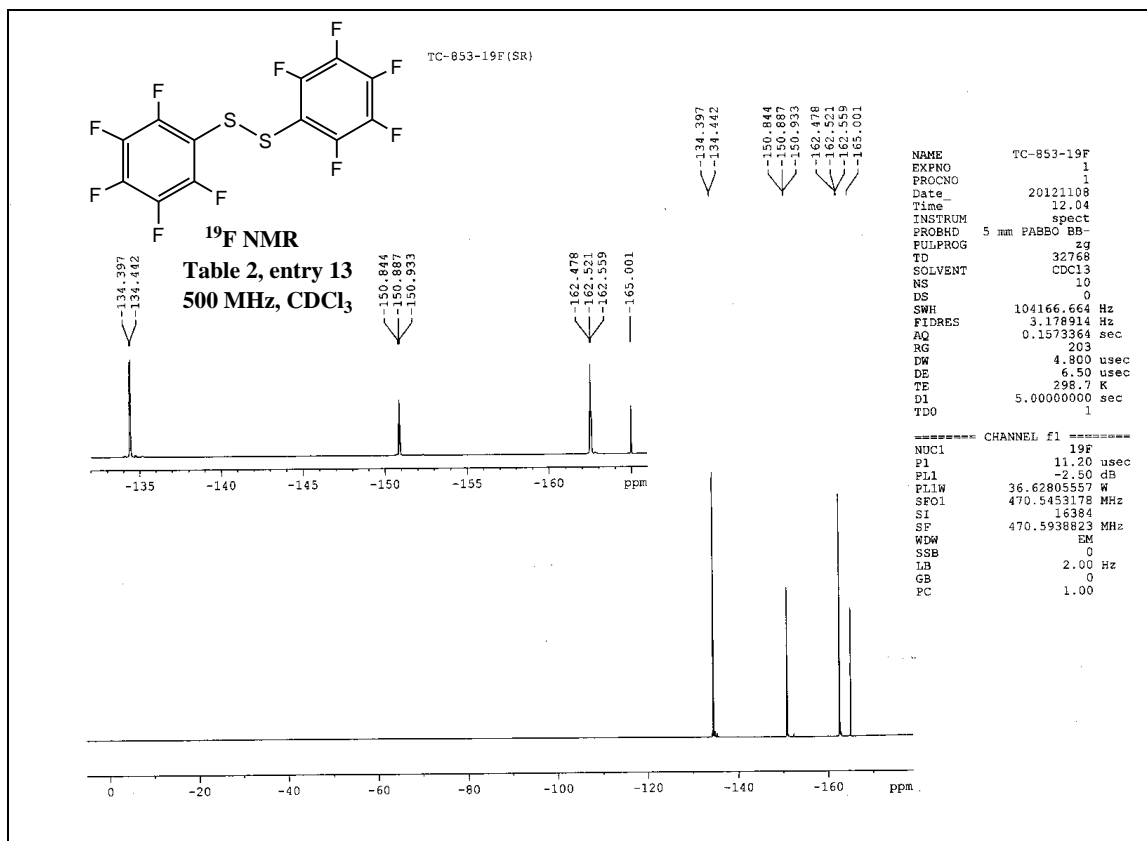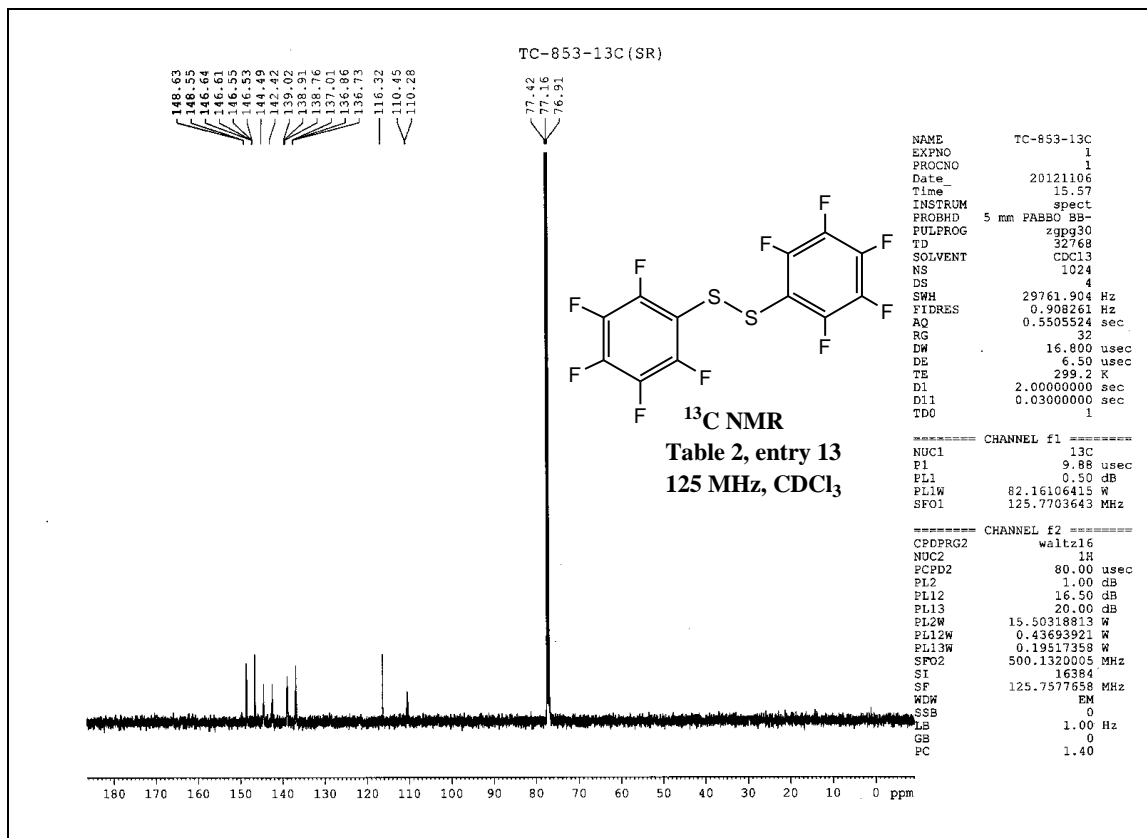

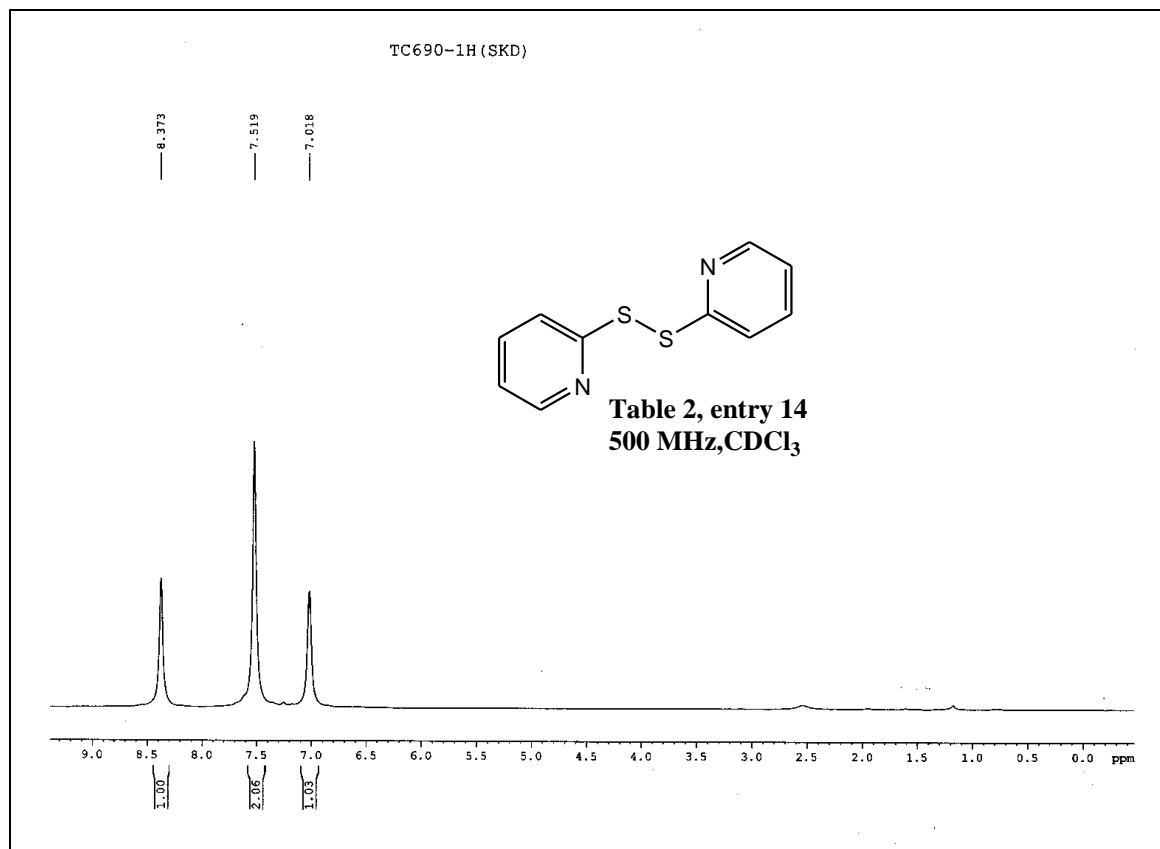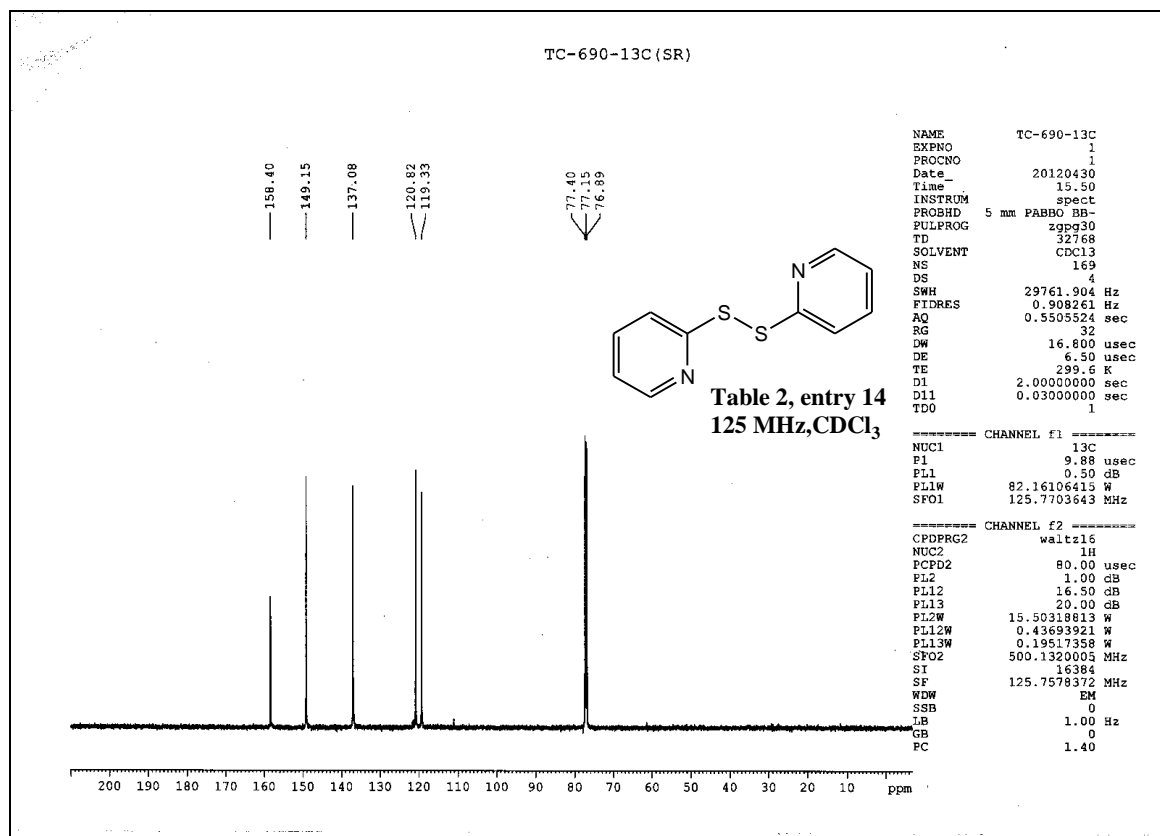

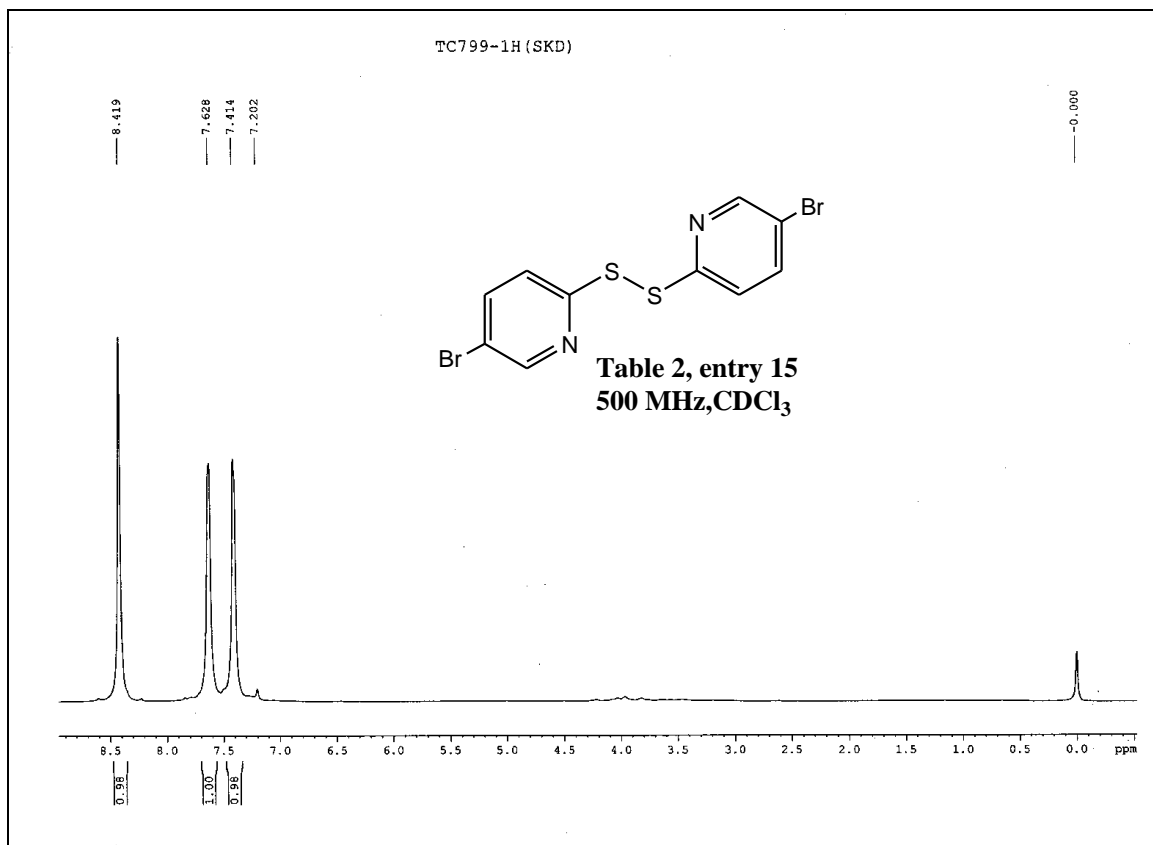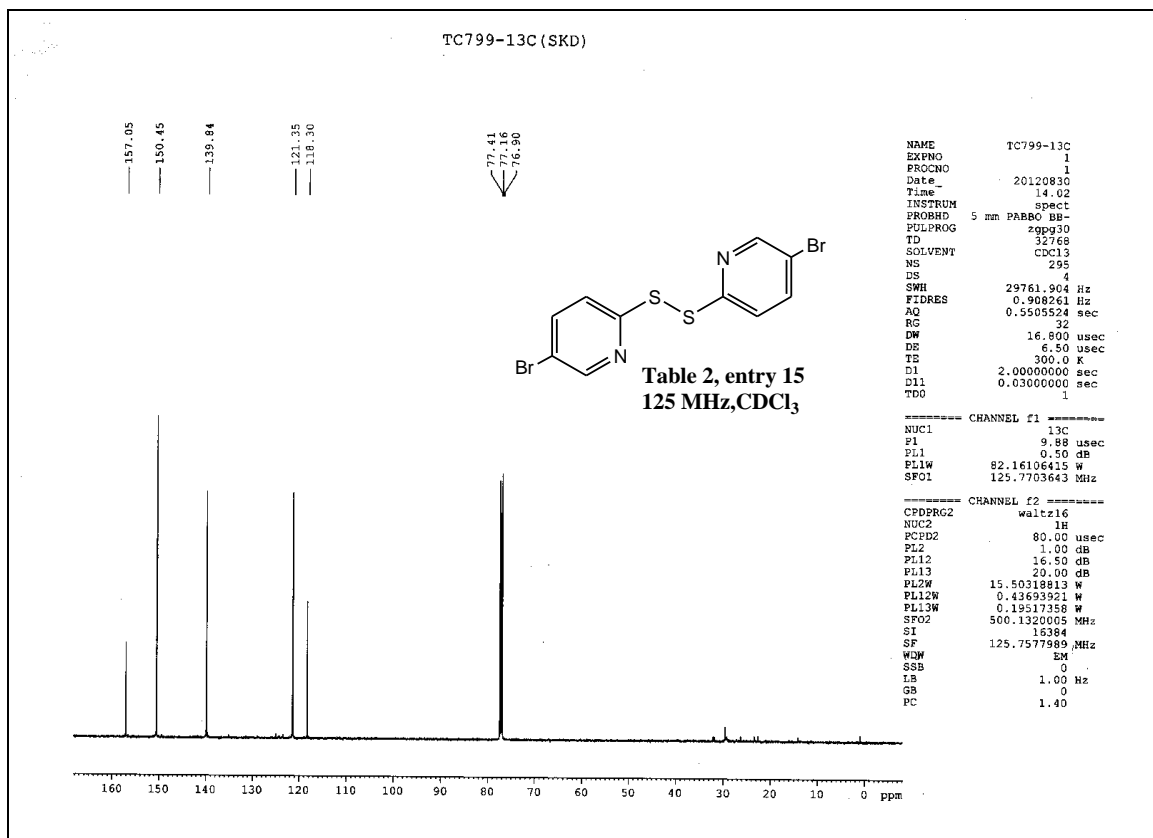



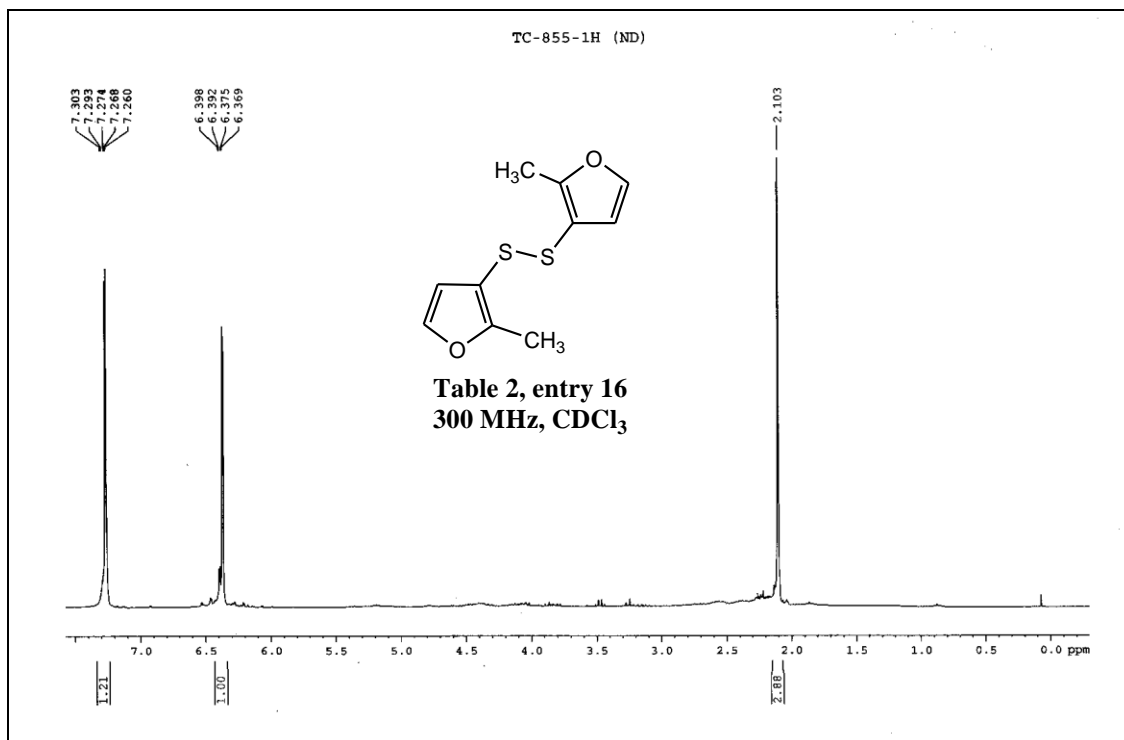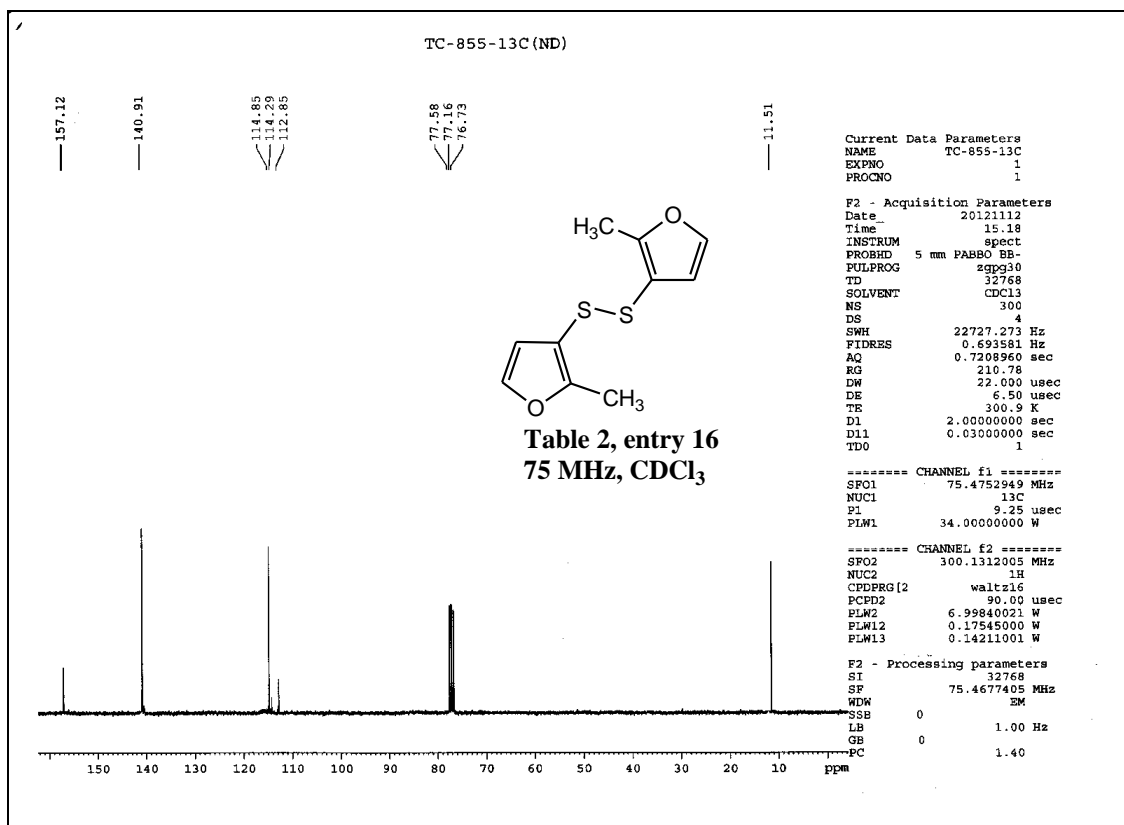

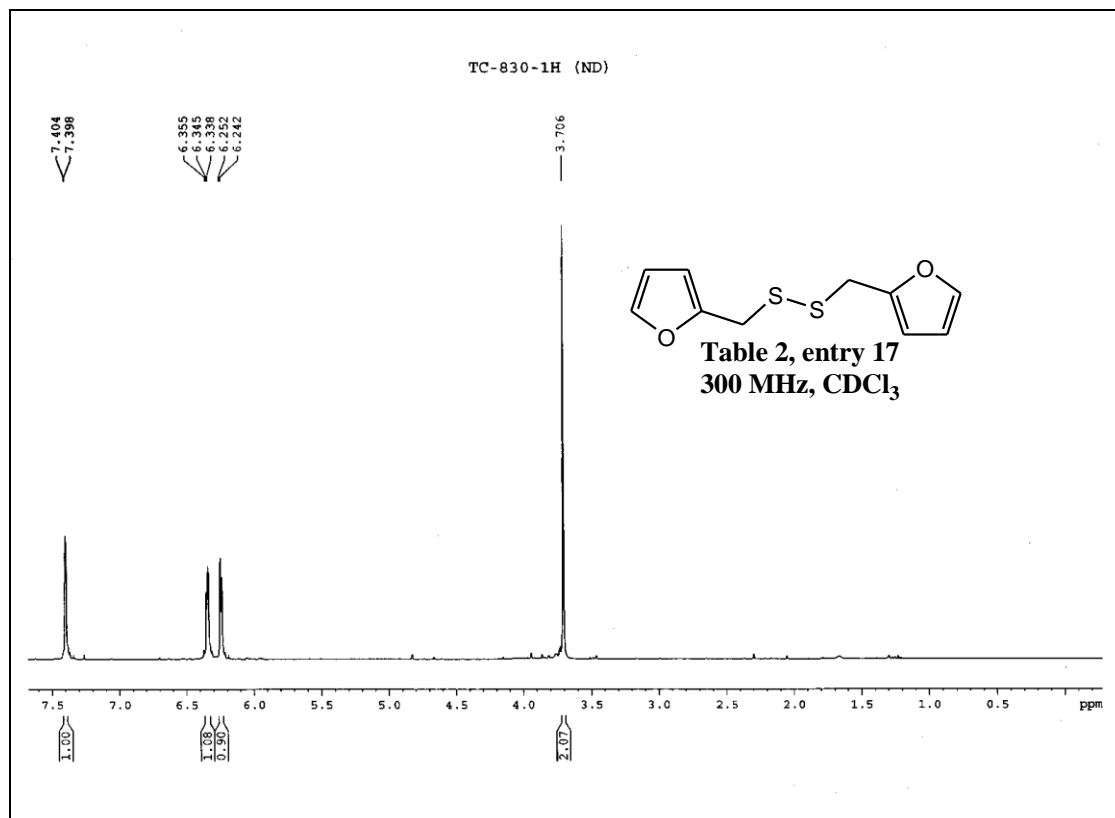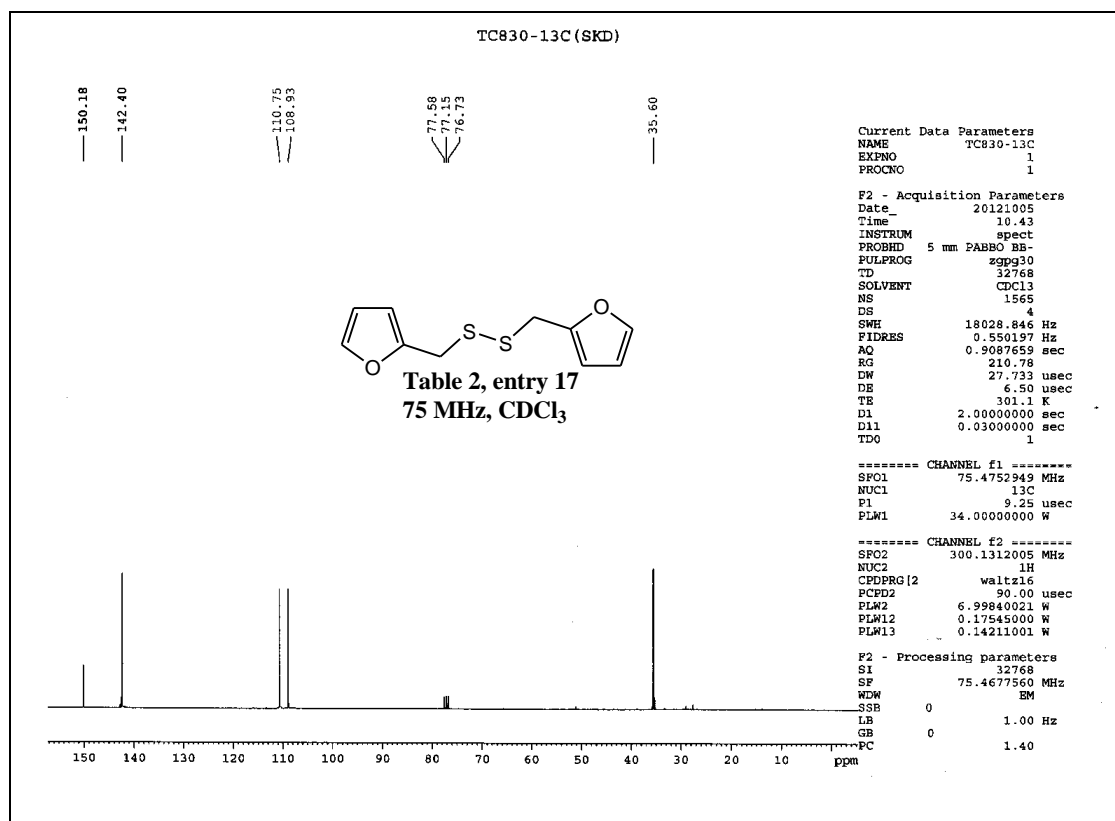

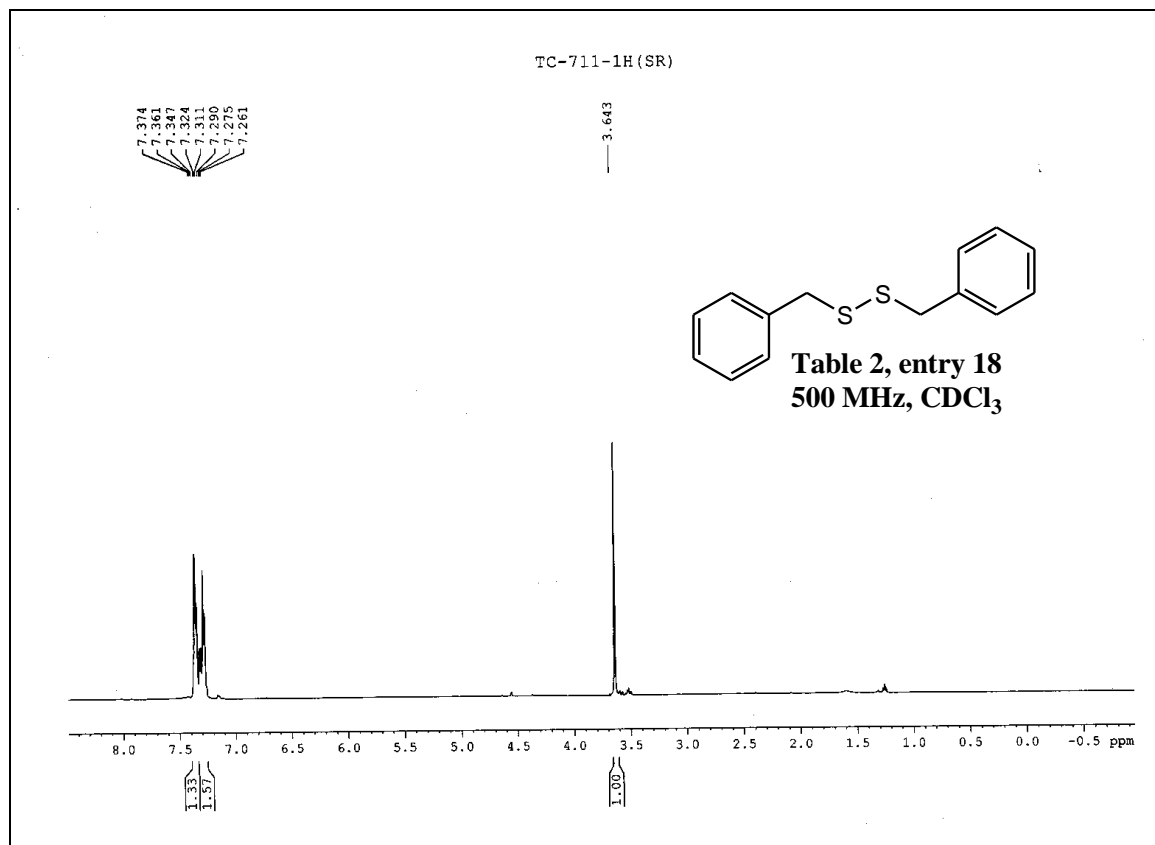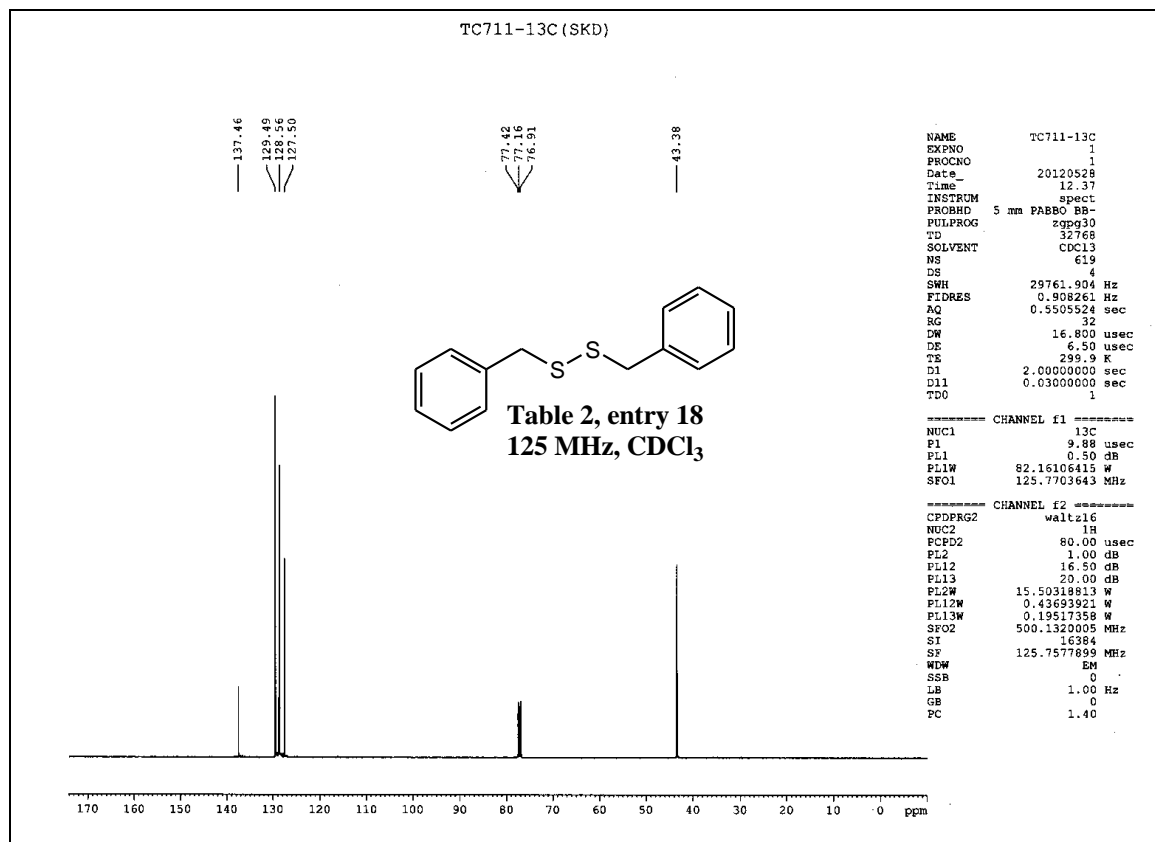

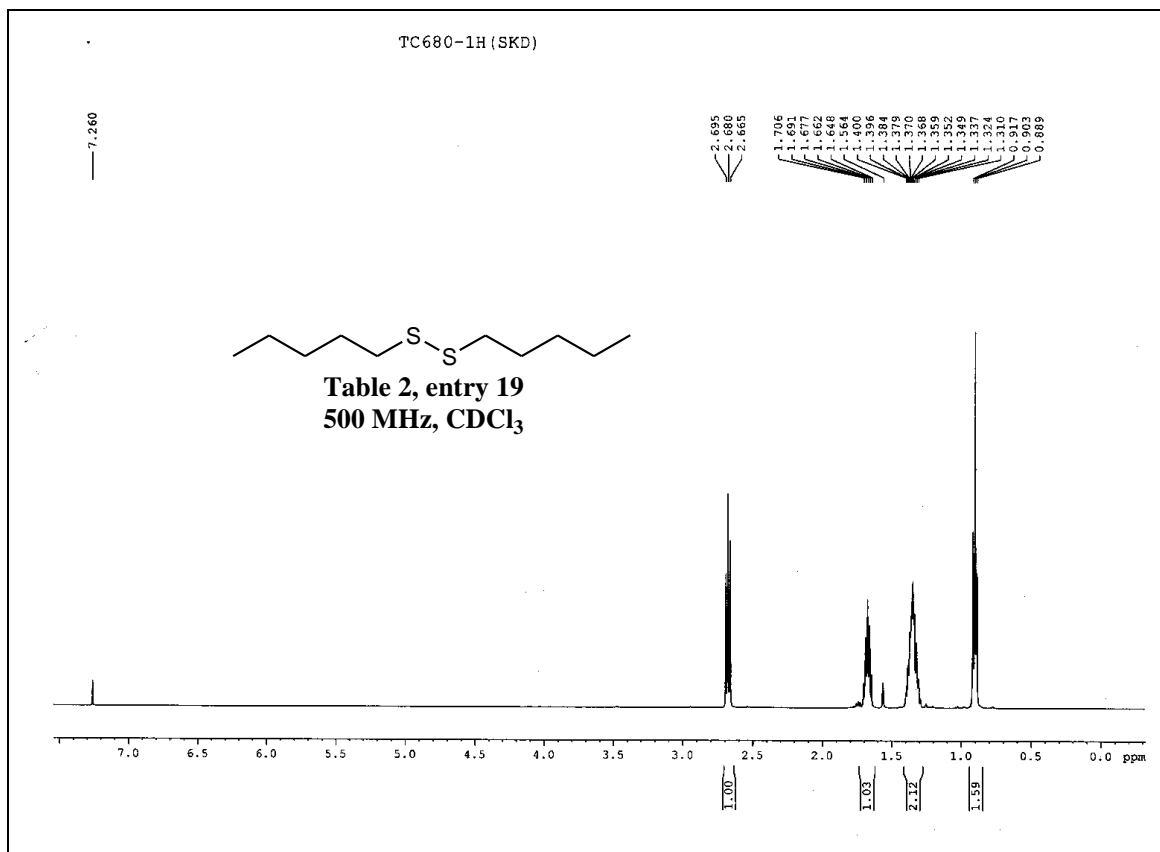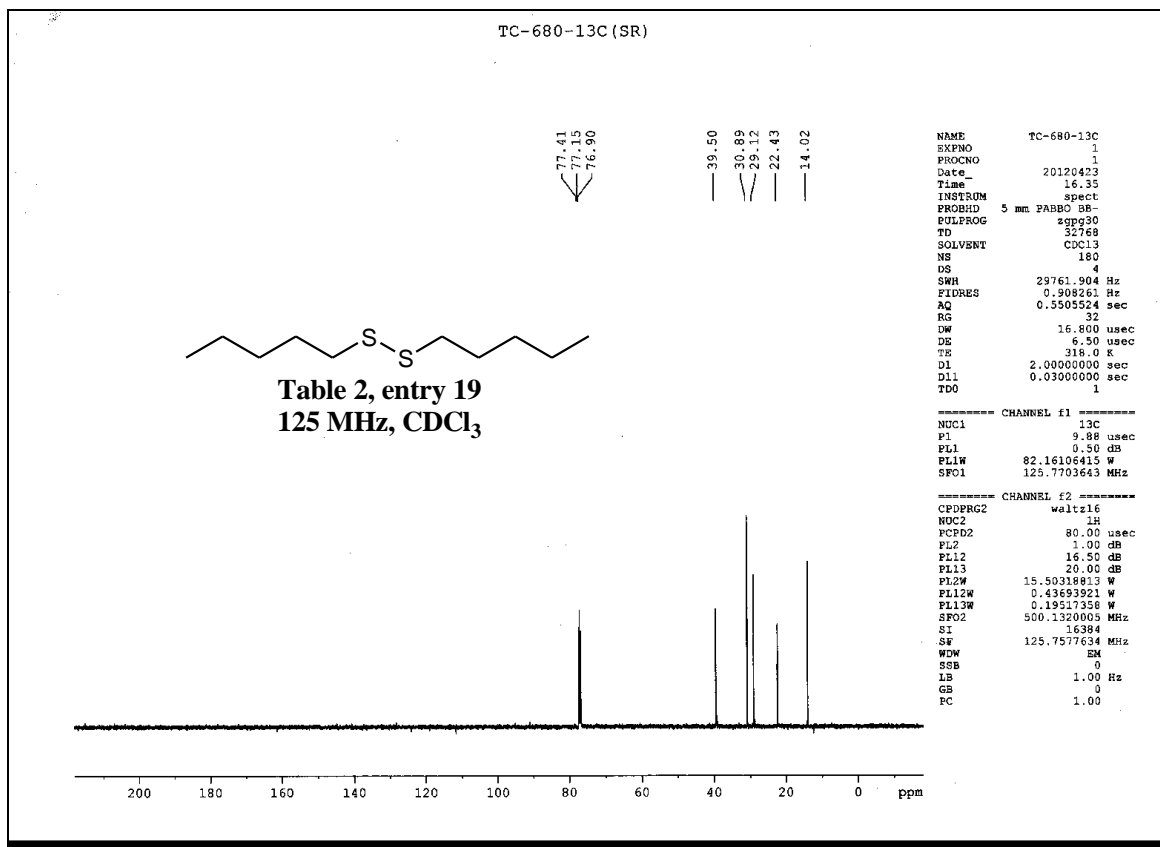

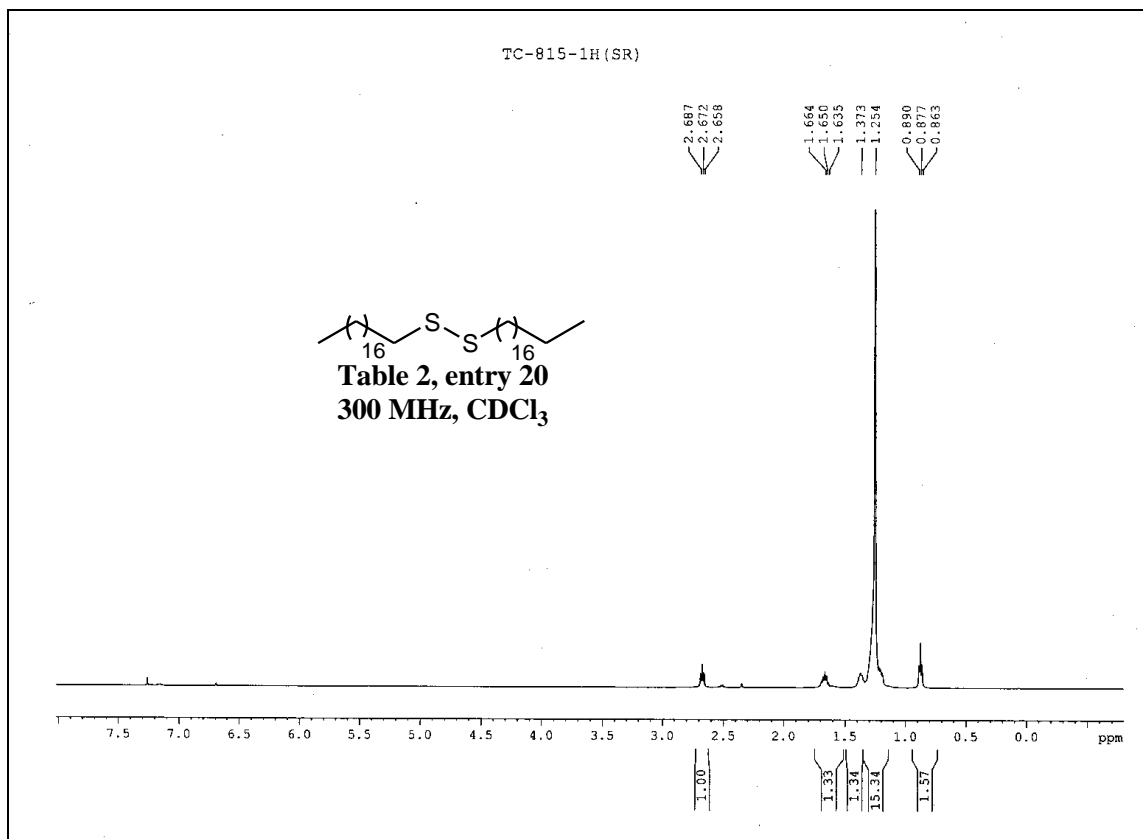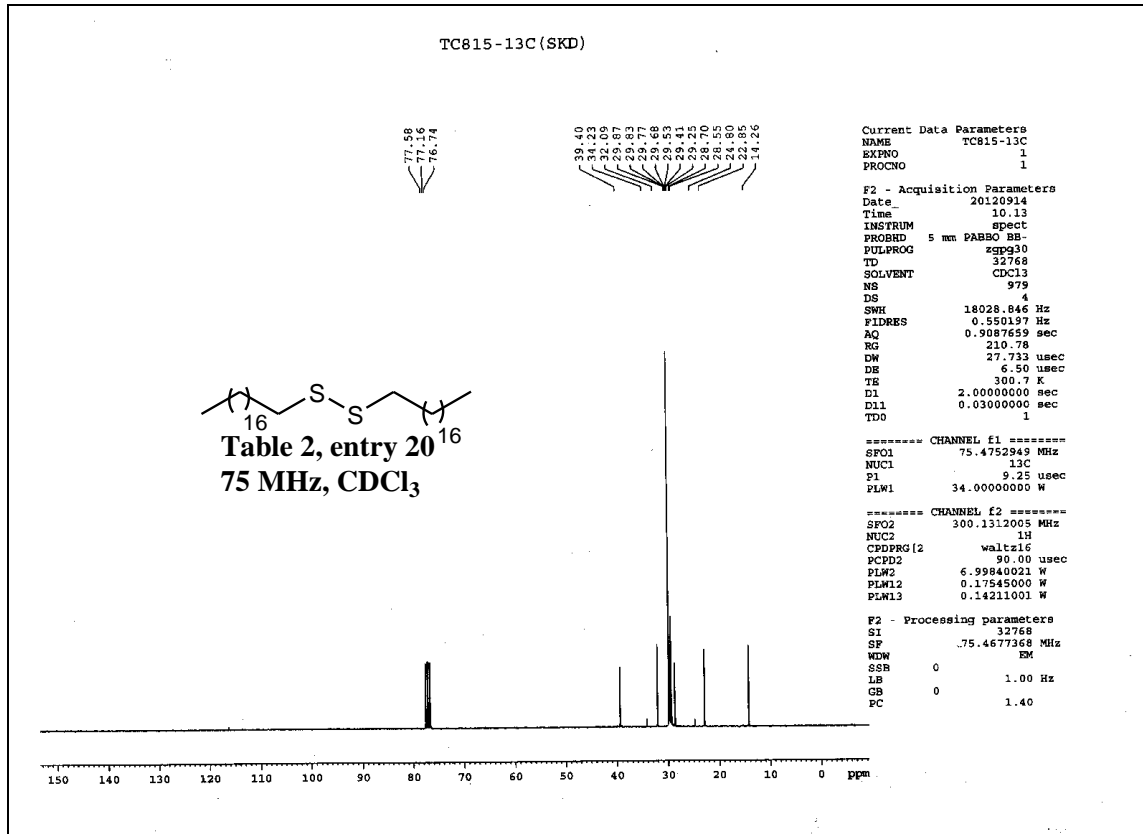

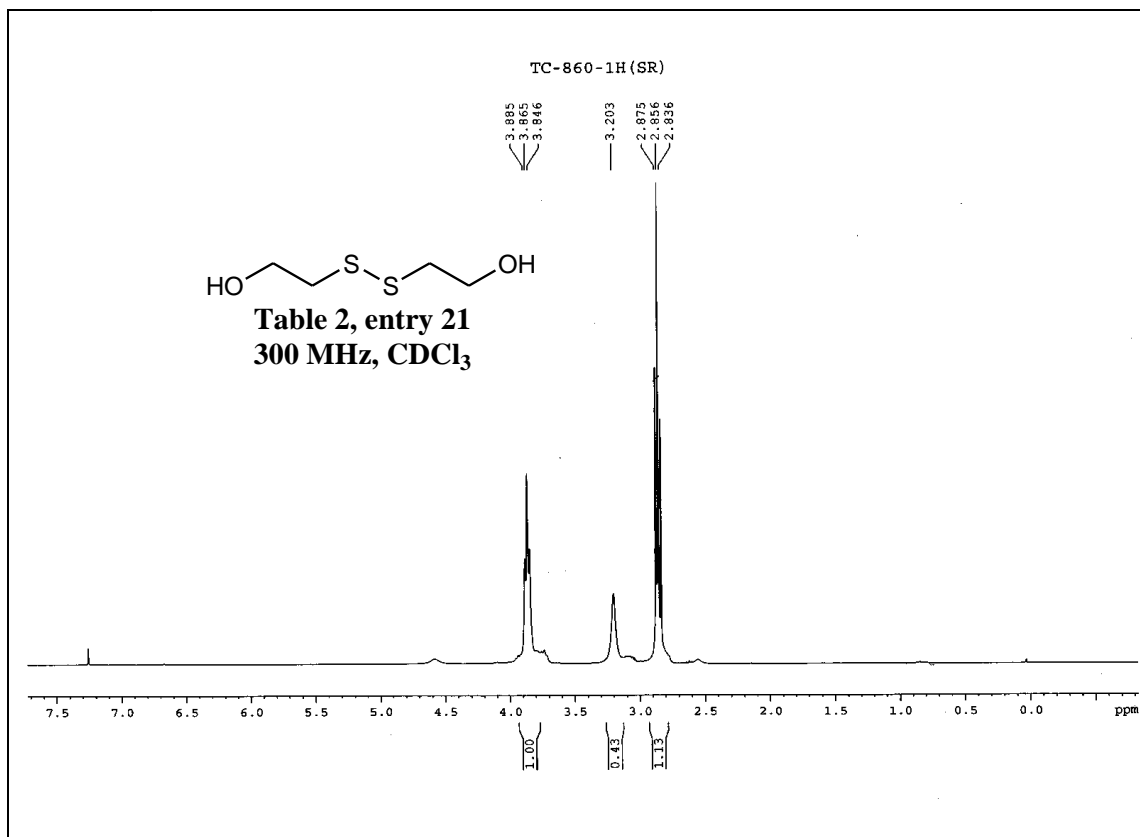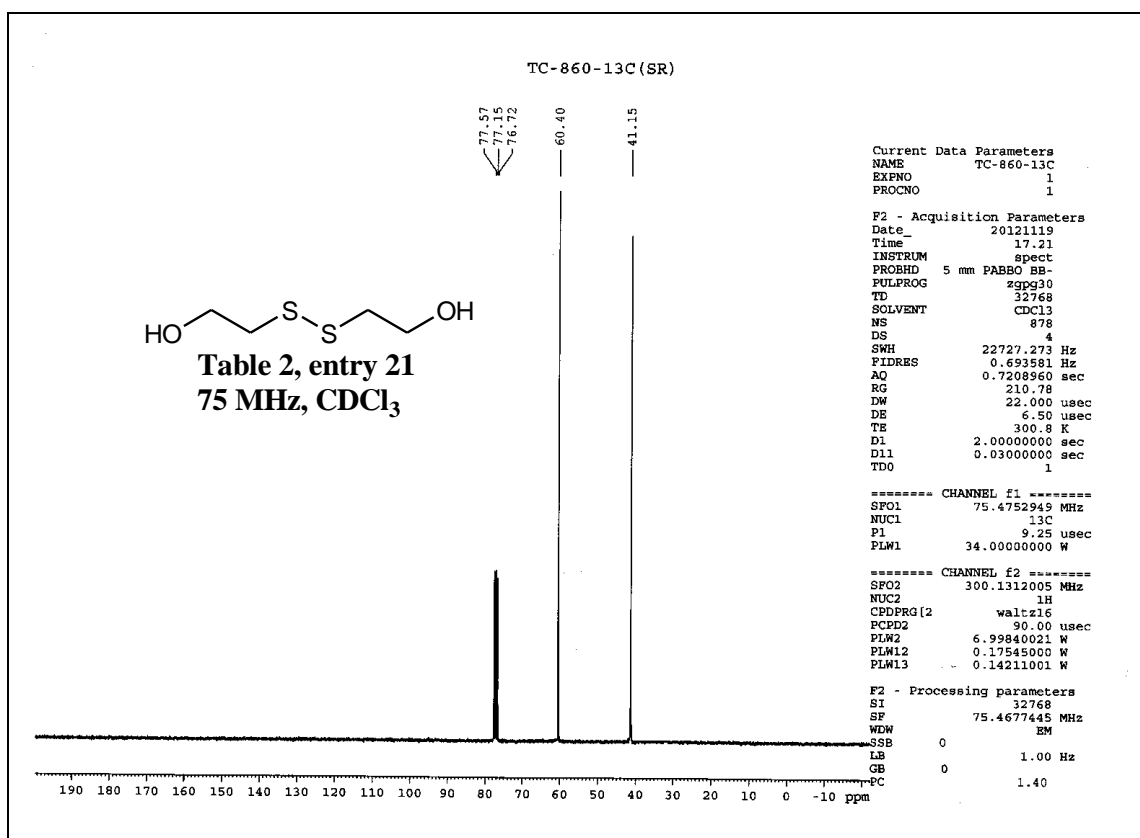

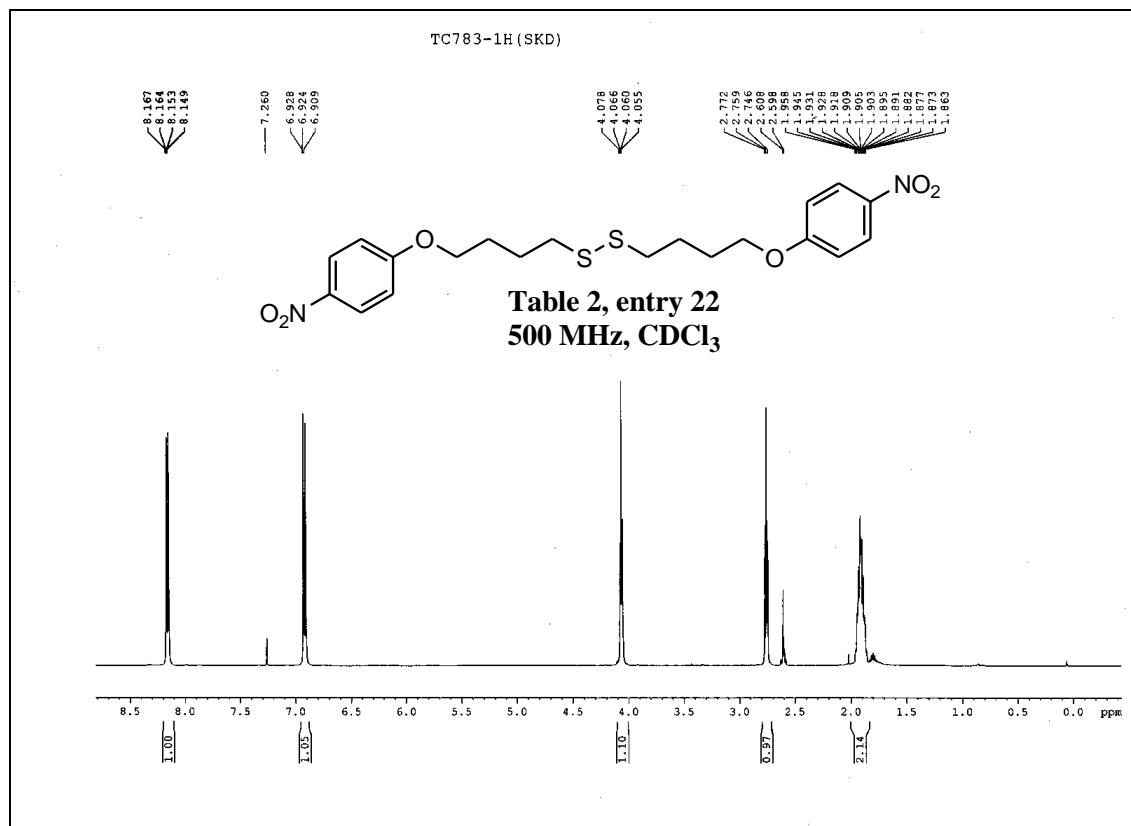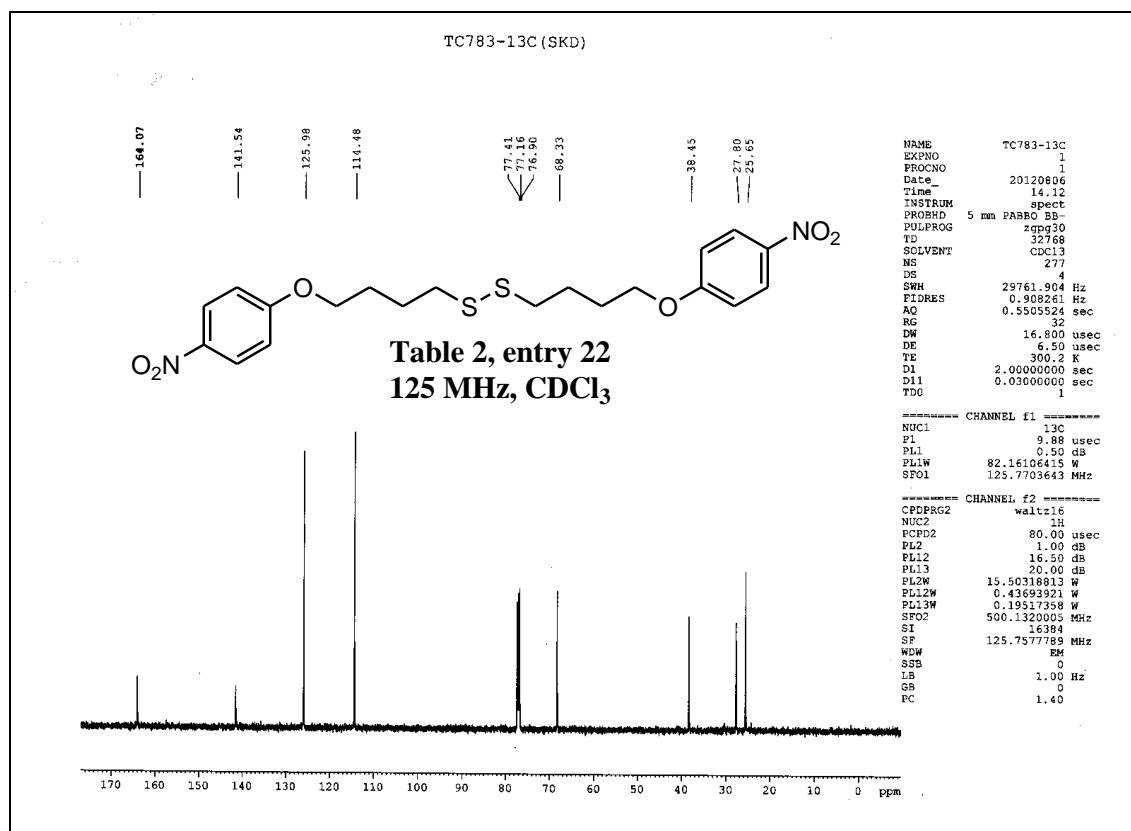

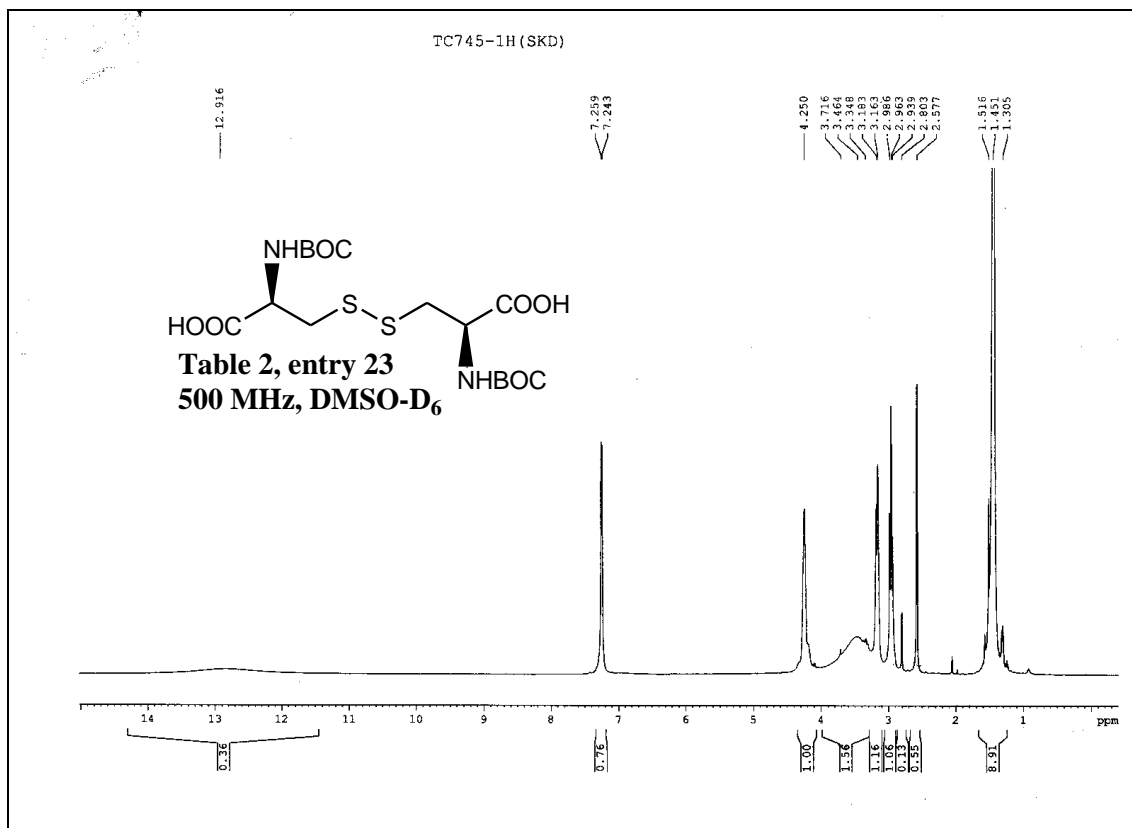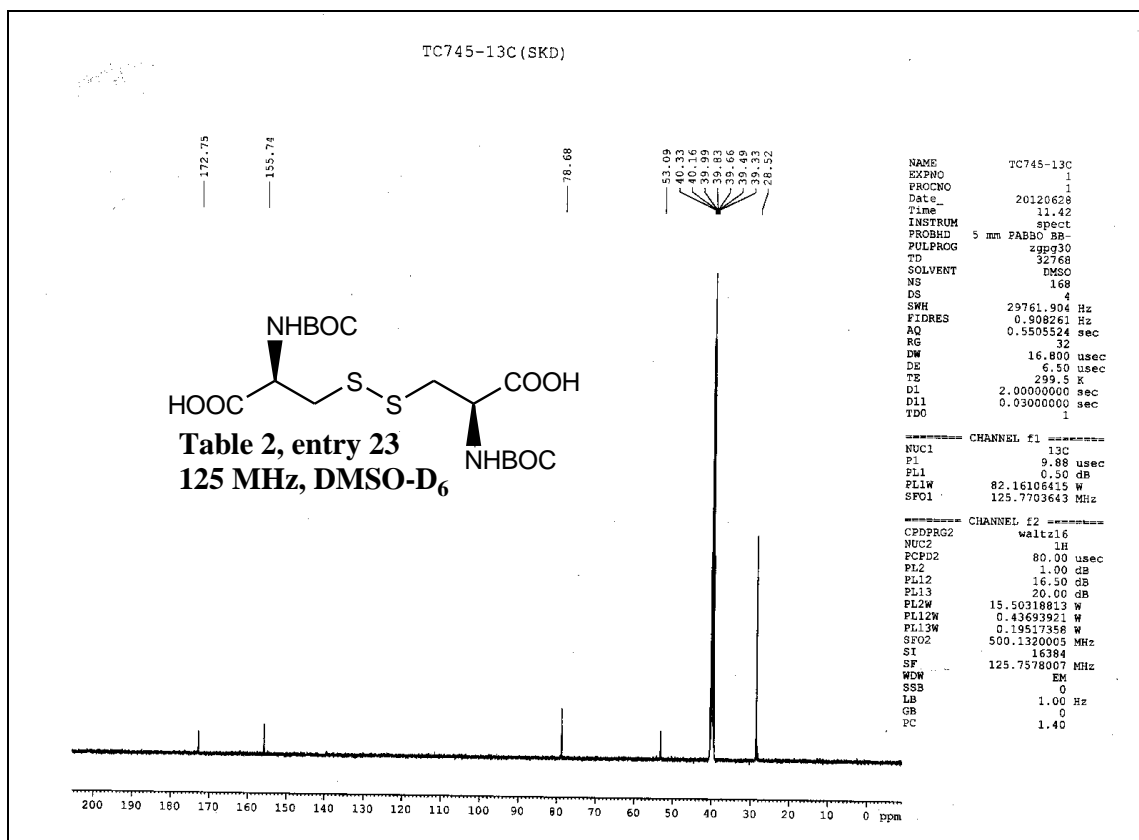

Supplement: c3ra41996g.pdf [file c3ra41996g.pdf]
